# Supplementary material for: Unappreciated diversification of stem archosaurs during the Middle Triassic predated the dominance of dinosaurs
Source: PubMed Central journal article supplement (PMC5024528; doi:10.1186/s12862-016-0761-6), 2016-09-15
Supplement: 12862_2016_761_MOESM1_ESM.pdf [file 12862_2016_761_MOESM1_ESM.pdf]

**Additional file 1**

**Unappreciated diversification of stem archosaurs during the Middle Triassic predated the dominance of dinosaurs**

Christian Foth<sup>1,2,3</sup>, Martin D. Ezcurra<sup>4,5</sup>, Roland B. Sookias<sup>5</sup>, Stephen L. Brusatte<sup>6</sup>,  
Richard J. Butler<sup>5</sup>

<sup>1</sup>Department of Geosciences, University of Fribourg/Freiburg, Fribourg, Switzerland

<sup>2</sup>SNSB, Bayerische Staatssammlung für Paläontologie und Geologie, München,  
Germany

<sup>3</sup>Department of Earth and Environmental Sciences and GeoBio-Center, Ludwig-  
Maximilians-Universität, München, Germany

<sup>4</sup>CONICET, Sección Paleontología de Vertebrados, Museo Argentino de Ciencias  
Naturales, Buenos Aires, Argentina

<sup>5</sup>School of Geography, Earth and Environmental Sciences, University of Birmingham,  
Birmingham, United Kingdom

<sup>6</sup>School of GeoSciences, University of Edinburgh, Grant Institute, James Hutton  
Road, Edinburgh EH9 3FE, UK

## Content

### 1. Taxon sampling

**Table S1.** List of Permian, Triassic and Early Jurassic taxa.

**Table S2.** List of additional taxa from the Middle and Late Jurassic and Cretaceous used to calculate ancestral shapes.

**Table S3.** Additional taxa for time calibration with data of occurrences.

### 2. Description of landmarks and semi-landmarks

**Table S4.** Description of landmarks and semi-landmark description.

**Fig. S1.** Distribution of landmarks and semi-landmarks.

### 3. Phylogeny

**Table S5.** Sources for phylogenetic position of taxa included in the informal supertree.

**Table S6.** Strength of the phylogenetic signal of the skull shape of Archosauromorpha.

**Fig. S2.** Supertree topology mapped into the morphospace of archosauromorphs.

### 4. Disparity and NPMANOVA results

**Table S7.** Sum of variances of Archosauromorpha through time.

**Table S8.** Statistical differences of sum of variances and morphospace position between subsequent time bins for all Archosauromorpha.

**Table S9.** Statistical differences of sum of variances and morphospace position between subsequent time bins for non-archosaurian Archosauromorpha.

**Table S10.** Sum of variances of non-archosauriform Archosauromorpha and non-archosaurian Archosauriformes through time.

**Table S11.** Statistical differences of sum of variances and morphospace position between subsequent time bins for non-archosauriform Archosauromorpha and non-archosaurian Archosauriformes when phytosaurs are members of the crown-group of Archosauria.

**Table S12.** Statistical differences of sum of variances and morphospace position between subsequent time bins for non-archosauriform Archosauromorpha and non-archosaurian Archosauriformes when phytosaurs are members of the stem-line of Archosauria.

**Table S13.** Statistical differences of sum of variances and morphospace position between subsequent time bins for Archosauria.

**Table S14.** Statistical differences of sum of variances and morphospace position between subsequent time bins for Pseudosuchia.

**Table S15.** Statistical differences of sum of variances and morphospace position between subsequent time bins for Ornithodira/Dinosauria.

**Table S16.** Statistical differences of sum of variances and morphospace position between different groups within time bin when phytosaurs are crown-archosaurs.

**Table S17.** Statistical differences of sum of variances and morphospace position between different groups within time bin when phytosaurs are stem-archosaurs.

## **5. Additional results and discussion points**

### **5.1. General disparity trend within archosauromorph cranium**

#### **5.2. The effect of the phylogenetic position of Phytosauria**

**Fig. S3.** Disparity of archosauromorphs through time from the late Permian to the end of the Early Jurassic with phytosaurs as members of the stem group.

**Fig. S4.** Two-dimensional morphospace of Late Triassic archosauromorphs showing the morphospace of non-archosaurian archosauromorphs including phytosaurs and crown archosaurs.

#### **5.3. Cranial disparity trends within Ornithodira**

**Fig. S5.** Temporal disparity of pseudosuchians and dinosaurs from the Carnian to the end of the Early Jurassic.

#### **5.4. The impact of ancestral shapes for disparity analyses**

**Table S18.** Sum of variances of Archosauromorpha (just terminal taxa) through time.

**Table S19.** Statistical differences of sum of variances and morphospace position between subsequent time bins for all Archosauromorpha (just terminal taxa).

**Table S20.** Statistical differences of sum of variances and morphospace position between subsequent time bins for non-archosaurian Archosauromorpha (just terminal taxa).

**Table S21.** Statistical differences of sum of variances and morphospace position between subsequent time bins for Archosauria (just terminal taxa).

**Table S22.** Statistical differences of sum of variances and morphospace position between subsequent time bins for Pseudosuchia (just terminal taxa).

**Table S23.** Statistical differences of sum of variances and morphospace position between subsequent time bins for Ornithodira/Dinosauria (just terminal taxa).

**Fig. S6.** Comparison of disparity through time for various archosauromorph groups, if shapes of hypothetical ancestors were included or excluded.

### **5.5. The impact sample size for disparity analyses**

**Table S24.** Results of ordinary least squares (OLS) and generalised least squares (GLS) regression of skull shape disparity sample size per bin.

### **5.6. The age of the Chañares Formation**

## **6. References**

## 1. Taxon sampling

**Table S1.** List of Permian, Triassic and Early Jurassic taxa used in the present analyses with data of occurrences (in million of years) and sources of skull reconstructions. The stratigraphic ages of the terminal taxa, upon which the time-calibration is based, were taken from the Paleobiology Database ([www.paleobiodb.org](http://www.paleobiodb.org)), but checked for accuracy and modified if required.

| Species                              | Clade           | Age                          | Time   | Source                           |
|--------------------------------------|-----------------|------------------------------|--------|----------------------------------|
| <i>Tanystropheus longobardicus</i>   | 'Protorosauria' | Anisian-Ladinian             | 242    | Nosotti 2007                     |
| <i>Langobardisaurus pandolfii</i>    | 'Protorosauria' | late Norian                  | 213.1  | Saller et al. 2013               |
| <i>Protorosaurus speneri</i>         | 'Protorosauria' | middle Wuchiapingian         | 257.3  | Gottmann-Quesada and Sander 2009 |
| <i>Prolacerta broomi</i>             | Prolacertidae   | Induan-early Olenekian       | 250.7  | Ezcurra and Butler 2015a         |
| <i>Proterosuchus fergusi</i>         | Proterosuchidae | Induan-early Olenekian       | 250.7  | Ezcurra and Butler 2015b         |
| <i>Proterosuchus alexanderi</i>      | Proterosuchidae | Induan-early Olenekian       | 250.7  | Ezcurra and Butler 2015b         |
| <i>Proterosuchus goweri</i>          | Proterosuchidae | Induan-early Olenekian       | 250.7  | Ezcurra and Butler 2015b         |
| <i>Trilophosaurus buettneri</i>      | Allokotosauria  | Norian                       | 217    | Sues and Fraser 2010             |
| <i>Azendohsaurus madagaskarensis</i> | Allokotosauria  | Ladinian-earliest Carnian    | 237    | Flynn et al. 2010                |
| <i>Bentonyx sidensis</i>             | Rhynchosauria   | late Anisian                 | 243.3  | Hone and Benton 2008             |
| <i>Hyperodapedon gordoni</i>         | Rhynchosauria   | late Carnian-earliest Norian | 228.95 | Benton 1983                      |
| <i>Hyperodapedon huxleyi</i>         | Rhynchosauria   | late Carnian-earliest Norian | 228.95 | Chatterjee 1974                  |
| <i>Hyperodapedon sanjuanensis</i>    | Rhynchosauria   | late Carnian-earliest Norian | 228.95 | Langer and Schultz 2000          |
| <i>Mesosuchus browni</i>             | Rhynchosauria   | early Anisian                | 245.9  | Dilkes 1998                      |
| <i>Rhynchosaurus articeps</i>        | Rhynchosauria   | Anisian                      | 244.6  | Benton 1990                      |
| <i>Rhynchosaurus brodiei</i>         | Rhynchosauria   | Anisian                      | 244.6  | Benton 1990                      |

|                                     |                   |                              |        |                          |
|-------------------------------------|-------------------|------------------------------|--------|--------------------------|
| <i>Teyumbaita sulcognathus</i>      | Rhynchosauria     | early Norian                 | 222.45 | Montefeltro et al. 2010  |
| <i>Erythrosuchus africanus</i>      | Erythrosuchidae   | early Anisian                | 245.9  | Nesbitt 2011             |
| <i>Garjainia prima</i>              | Erythrosuchidae   | late Olenekian               | 248.2  | Ezcurra and Butler 2015a |
| <i>Shansisuchus shansisuchus</i>    | Erythrosuchidae   | late Anisian                 | 243.3  | Wang et al. 2013         |
| <i>Chanaresuchus bonapartei</i>     | Proterochampsidae | Ladinian-earliest Carnian    | 237    | Nesbitt 2011             |
| <i>Gualosuchus reigi</i>            | Proterochampsidae | Ladinian-earliest Carnian    | 237    | Romer 1971               |
| <i>Euparkeria capensis</i>          | Euparkeriidae     | early Anisian                | 245.9  | Nesbitt 2011             |
| <i>Parasuchus hislopi</i>           | Phytosauria       | late Carnian-earliest Norian | 228.95 | Sereno 1991              |
| <i>Smilosuchus gregorii</i>         | Phytosauria       | early Norian                 | 222.35 | Nesbitt 2011             |
| <i>Brachysuchus megalodon</i>       | Phytosauria       | late Carnian-early Norian    | 224.85 | Case 1929                |
| <i>Mystriosuchus planirostris</i>   | Phytosauria       | late Norian                  | 213.1  | Hungerbuhler 2002        |
| <i>Mystriosuchus westphali</i>      | Phytosauria       | late Norian                  | 213.1  | Hungerbuhler 2002        |
| <i>Leptosuchus adamanensis</i>      | Phytosauria       | Norian                       | 217.75 | Sues and Fraser 2010     |
| <i>Leptosuchus studeri</i>          | Phytosauria       | early Norian                 | 222.35 | Case and White 1934      |
| <i>Nicrosaurus kapffi</i>           | Phytosauria       | late Norian                  | 213.1  | Westphal 1976            |
| <i>Pseudopalatus pristinus</i>      | Phytosauria       | late Norian-Rhaetian         | 209.5  | Camp 1930                |
| <i>Riojasuchus tenuisiceps</i>      | Ornithosuchidae   | middle Norian                | 216    | Nesbitt 2011             |
| <i>Ornithosuchus longidens</i>      | Ornithosuchidae   | late Carnian-earliest Norian | 228.95 | Sereno 1991              |
| <i>Gracilisuchus stipanicicorum</i> | Suchia            | Ladinian-earliest Carnian    | 237    | Nesbitt 2011             |
| <i>Qianosuchus mixtus</i>           | Poposauroida      | Anisian                      | 244.6  | Li et al. 2006           |
| <i>Effigia okeeffeae</i>            | Poposauroida      | late Norian-Rhaetian         | 209.5  | Nesbitt 2011             |
| <i>Desmatosuchus smalli</i>         | Aetosauria        | ? late Norian                | 213.1  | Small 2002               |
| <i>Stenomyti huangae</i>            | Aetosauria        | late Norian-Rhaetian         | 209.5  | Small and Martz 2013     |

|                                          |                 |                              |        |                            |
|------------------------------------------|-----------------|------------------------------|--------|----------------------------|
| <i>Stagonolepis robertsoni</i>           | Aetosauria      | late Carnian-earliest Norian | 228.95 | Sulej 2010                 |
| <i>Stagonolepis olenkae</i>              | Aetosauria      | late Carnian                 | 229.5  | Sulej 2010                 |
| <i>Neoaetosauroides engaeus</i>          | Aetosauria      | middle Norian                | 216    | Desojo and Baez 2007       |
| <i>Aetosaurus ferratus</i>               | Aetosauria      | late Norian                  | 213.1  | Schoch 2007                |
| <i>Revueltosaurus callenderi</i>         | Aetosauria      | Norian-Rhaetian              | 213.65 | Nesbitt 2011               |
| <i>Postosuchus kirkpatricki</i>          | Rauisuchidae    | Norian-Rhaetian              | 213.65 | Weinbaum 2011              |
| <i>Prestosuchus chiniquiensis</i>        | Loricata        | Ladinian-earliest Carnian    | 237    | Sues and Fraser 2010       |
| <i>Saurosuchus galilei</i>               | Loricata        | late Carnian-earliest Norian | 228.95 | Nesbitt 2011               |
| <i>Batrachotomus kuperferzellensis</i>   | Loricata        | late Ladinian (Longobardian) | 238.25 | Nesbitt 2011               |
| <i>Dromicosuchus grallator</i>           | Crocodylomorpha | early Norian                 | 222.35 | Nesbitt 2011               |
| <i>Protosuchus richardsoni</i>           | Crocodylomorpha | Hettangian                   | 200.3  | Nesbitt 2011               |
| <i>Dibothrosuchus elaphros</i>           | Crocodylomorpha | ?Hettangian-Sinemurian       | 196.05 | Wu and Chatterjee 1993     |
| <i>Sphenosuchus acutus</i>               | Crocodylomorpha | Hettangian-Sinemurian        | 196.05 | Nesbitt 2011               |
| <i>Pelagosaurus typus</i>                | Crocodylomorpha | early Toarcian               | 179.3  | Pierce and Benton 2006     |
| <i>Eudimorphodon ranzii</i>              | Pterosauria     | late Norian                  | 210    | Nesbitt 2011               |
| <i>Campylognathoides spp.</i>            | Pterosauria     | early Toarcian               | 182.5  | Wellnhofer 1978 (modified) |
| <i>Dorygnathus banthensis</i>            | Pterosauria     | early Toarcian               | 182.5  | Wellnhofer 1978 (modified) |
| <i>Tawa hallae</i>                       | Theropoda       | late Norian-Rhaetian         | 209.5  | Nesbitt 2011               |
| <i>Herrerasaurus ischigualastensis</i>   | Theropoda       | late Carnian-earliest Norian | 228.95 | Nesbitt 2011               |
| <i>Coelophysis bauri</i>                 | Theropoda       | late Norian-Rhaetian         | 209.5  | Nesbitt 2011               |
| ' <i>Syntarsus</i> ' <i>kayentakatae</i> | Theropoda       | Sinemurian-Pliensbachian     | 191    | Tykoski 2005               |
| <i>Zupaysaurus rougieri</i>              | Theropoda       | middle Norian                | 216    | Ezcurra 2007               |
| <i>Dilophosaurus wetherilli</i>          | Theropoda       | Sinemurian-Pliensbachian     | 191    | Rauhut 2003                |

|                                   |                 |                              |        |                      |
|-----------------------------------|-----------------|------------------------------|--------|----------------------|
| <i>Eoraptor lunensis</i>          | Sauropodomorpha | late Carnian-earliest Norian | 228.95 | Sereno et al. 2013   |
| <i>Adeopapposaurus mognai</i>     | Sauropodomorpha | Early Jurassic               | 187.7  | Martinez 2009        |
| <i>Plateosaurus</i> spp.          | Sauropodomorpha | late Norian-Rhaetian         | 209.65 | Yates 2003           |
| <i>Melanorosaurus readi</i>       | Sauropodomorpha | middle Norian-Rhaetian       | 214.15 | Yates 2007           |
| <i>Unaysaurus tolentinoi</i>      | Sauropodomorpha | early Norian                 | 222.45 | Leal et al. 2004     |
| <i>Pampadromaeus barberenai</i>   | Sauropodomorpha | late Carnian-earliest Norian | 228.95 | Cabreira et al. 2011 |
| <i>Jingshanosaurus xinwaensis</i> | Sauropodomorpha | Hettangian                   | 200.3  | Yates 2012           |
| <i>Massospondylus carinatus</i>   | Sauropodomorpha | Hettangian-Sinemurian        | 196.05 | Gow et al. 1990      |
| <i>Lesothosaurus diagnosticus</i> | Ornithischia    | Hettangian-Sinemurian        | 196.05 | Nesbitt 2011         |
| <i>Heterodontosaurus tucki</i>    | Ornithischia    | Hettangian-Sinemurian        | 196.05 | Norman et al. 2011   |
| <i>Emausaurus ernsti</i>          | Ornithischia    | Toarcian                     | 182.5  | Haubold 1990         |



**Table S2.** List of additional taxa from the Middle and Late Jurassic and Cretaceous used to calculate ancestral shapes falling into the Early Jurassic in the present analyses with data of occurrences (in million of years) and sources of skull reconstructions.

| Species                                | Clade           | Age                     | Time   | Source                  |
|----------------------------------------|-----------------|-------------------------|--------|-------------------------|
| <i>Dakosaurus andiniensis</i>          | Crocodylomorpha | Tithonian-Berriasian    | 145.95 | Pol and Gasparini 2009  |
| <i>Isisfordia duncani</i>              | Crocodylomorpha | Albian-Cenomanian       | 99.4   | Salisbury et al. 2006   |
| <i>Mahajangasuchus insignis</i>        | Crocodylomorpha | Maastrichtian           | 69.05  | Turner and Buckley 2008 |
| <i>Sarcosuchus imperator</i>           | Crocodylomorpha | Berriasian-Cenomanian   | 119.25 | Sereno et al. 2001      |
| <i>Montealtosuchus arrudacamposi</i>   | Crocodylomorpha | Turonian-Santonian      | 88.75  | Carvalho et al. 2007    |
| <i>Leidyosuchus canadensis</i>         | Crocodylomorpha | Campanian               | 77.1   | Wu et al. 2001          |
| <i>Hamadasuchus rebouli</i>            | Crocodylomorpha | Albian-Cenomanian       | 103.25 | Larsson and Sues 2007   |
| <i>Kaprosuchus saharicus</i>           | Crocodylomorpha | Cenomnianian            | 97.2   | Sereno and Larsson 2009 |
| <i>Notosuchus terrestris</i>           | Crocodylomorpha | Santonian               | 84.95  | Fiorelli and Calvo 2008 |
| <i>Mariliasuchus amarali</i>           | Crocodylomorpha | Campanian-Maastrichtian | 74.8   | Zaher et al. 2006       |
| <i>Malawisuchus mwakasyungutiensis</i> | Crocodylomorpha | Aptian                  | 119    | Gomani 1997             |
| <i>Gobiosuchus kielanae</i>            | Crocodylomorpha | Campanian               | 77.1   | Osmólska et al. 1997    |
| <i>Araripesuchus wegneri</i>           | Crocodylomorpha | Aptian-Albian           | 112.75 | Sereno and Larsson 2009 |
| <i>Simosuchus clarki</i>               | Crocodylomorpha | Maastrichtian           | 69.05  | Kley et al. 2010        |
| <i>Anatosuchus minor</i>               | Crocodylomorpha | Aptian-Albian           | 112.75 | Sereno and Larsson 2009 |
| <i>Campinasuchus dinizi</i>            | Crocodylomorpha | Turonian-Santonian      | 88.75  | Carvalho et al. 2011    |
| <i>Scaphognathus crassirostris</i>     | Pterosauria     | Tithonian               | 148.55 | Bennett 2014            |
| <i>Monolophosaurus jiangi</i>          | Theropoda       | Callovian               | 164.8  | Rauhut 2003             |
| <i>Haplocheirus sollers</i>            | Theropoda       | Oxfordian               | 160.4  | photo material by CF    |

|                                      |                 |                        |        |                          |
|--------------------------------------|-----------------|------------------------|--------|--------------------------|
| <i>Guanlong wucaii</i>               | Theropoda       | Oxfordian              | 160.4  | Xu et al. 2006a          |
| <i>Sinraptor dongi</i>               | Theropoda       | Oxfordian              | 160.4  | Currie and Zhao 1993     |
| <i>Allosaurus fragilis</i>           | Theropoda       | Kimmeridgian-Tithonian | 151.15 | Loewen 2009              |
| <i>Ceratosaurus nasicornis</i>       | Theropoda       | Kimmeridgian-Tithonian | 151.15 | Sampson and Witmer 2007  |
| <i>Limusaurus inextricabilis</i>     | Theropoda       | Oxfordian              | 160.4  | Xu et al. 2009           |
| <i>Compsognathus longipes</i>        | Theropoda       | Tithonian              | 148.55 | Peyer 2006               |
| <i>Archaeopteyx lithographica</i>    | Theropoda       | Tithonian              | 148.55 | Rauhut 2014              |
| <i>Shunosaurus lii</i>               | Sauropodomorpha | Bajocian-Callovian     | 166.9  | Rauhut et al. 2011       |
| <i>Mamenchisaurus youngi</i>         | Sauropodomorpha | Oxfordian              | 160.4  | Ouyang and Ye 2002       |
| <i>Diplodocus spp.</i>               | Sauropodomorpha | Kimmeridgian-Tithonian | 151.15 | Wilson and Sereno 1998   |
| <i>Camarasaurus lentus</i>           | Sauropodomorpha | Kimmeridgian-Tithonian | 151.15 | Wilson and Sereno 1998   |
| <i>Giraffatitan brancai</i>          | Sauropodomorpha | Kimmeridgian-Tithonian | 151.15 | Wilson and Sereno 1998   |
| <i>Huayangosaurus taibaii</i>        | Ornithischia    | Bajocian-Callovian     | 166.9  | Sereno and Dong 1992     |
| <i>Stegosaurus stenops</i>           | Ornithischia    | Kimmeridgian-Tithonian | 151.15 | Sereno and Dong 1992     |
| <i>Dysalotosaurus lettowvorbecki</i> | Ornithischia    | upper Kimmeridgian     | 153.25 | Hübner and Rauhut 2010   |
| <i>Agilisaurus louderbacki</i>       | Ornithischia    | Bajocian-Callovian     | 166.9  | Barrett et al. 2005      |
| <i>Yinlong downsi</i>                | Ornithischia    | Oxfordian              | 160.4  | Xu et al. 2006b          |
| <i>Camptosaurus dispar</i>           | Ornithischia    | Kimmeridgian-Tithonian | 151.15 | Brill and Carpenter 2006 |
| <i>Psittacosaurus mongoliensis</i>   | Ornithischia    | Lower Cretaceous       | 122.75 | Sereno et al. 1988       |

**Table S3.** Additional taxa for time calibration with data of occurrences (in millions of years).

| Species                          | Clade            | Age                          | Time   |
|----------------------------------|------------------|------------------------------|--------|
| <i>Noteosuchus colletti</i>      | Rhynchosauria    | Induan-early Olenekian       | 250.7  |
| <i>Archosaurus rossicus</i>      | Proterosuchidae  | Changhsingian                | 253.15 |
| <i>Dorosuchus neoetus</i>        | Archosauriformes | Anisian                      | 244.6  |
| <i>Aetosauroides scagliai</i>    | Aetosauria       | late Carnian-earliest Norian | 228.95 |
| <i>Turfanosuchus dabanensis</i>  | Gracilisuchidae  | late Anisian                 | 243.3  |
| <i>Ticinosuchus ferox</i>        | Suchia           | late Anisian                 | 243.3  |
| <i>Ctenosauriscus koeneni</i>    | Poposauroida     | late Olenekian               | 248.2  |
| <i>Orthosuchus stormbergi</i>    | Crocodyliformes  | Hettangian-Sinemurian        | 196.05 |
| <i>Hsisosuchus dashanpuensis</i> | Crocodyliformes  | Bajocian-Calloviaian         | 166.9  |
| <i>Calsoyasuchus valliceps</i>   | Crocodyliformes  | Sinemurian-Pliensbachian     | 191    |
| <i>Asilisaurus kongwe</i>        | Ornithodira      | late Anisian                 | 243.3  |
| <i>Pisanosaurus mertii</i>       | Ornithischia     | late Carnian-earliest Norian | 228.95 |
| <i>Eocursor parvus</i>           | Ornithischia     | middle Norian-Rhaetian       | 214.15 |
| <i>Scelidosaurus harrisonii</i>  | Ornithischia     | Sinemurian                   | 195.05 |
| <i>Vulcanodon karibaensis</i>    | Sauropodomorpha  | Hettangian                   | 200.3  |
| <i>Camposaurus arizonensis</i>   | Theropoda        | early Norian                 | 221.15 |
| <i>Berberosaurus liassicus</i>   | Theropoda        | Pliensbachian-Toarcian       | 182.45 |
| <i>Proceratosaurus bradleyi</i>  | Theropoda        | Bathonian                    | 166.2  |

## 2. Description of landmarks and semi-landmarks

**Table S4.** Description of landmarks and semi-landmark description. Semi-landmarks (semi-LMs) are marked with an ‘S’ (Fig. S1).

| LMs | Description                                                                                                                                                                                                                                                                                                                                                                                                                                                                                                                                                                 |
|-----|-----------------------------------------------------------------------------------------------------------------------------------------------------------------------------------------------------------------------------------------------------------------------------------------------------------------------------------------------------------------------------------------------------------------------------------------------------------------------------------------------------------------------------------------------------------------------------|
| 1   | Most anterior point of the premaxilla along the tooth row.                                                                                                                                                                                                                                                                                                                                                                                                                                                                                                                  |
| 2   | Contact of the lateral wall of premaxilla and maxilla along the tooth row (thereby making it possible to capture the subnarial notches of <i>Heterodontosaurus</i> , <i>Protosuchus</i> and <i>Tawa</i> ).                                                                                                                                                                                                                                                                                                                                                                  |
| 3   | Contact between maxilla and jugal along the ventral margin of the skull.                                                                                                                                                                                                                                                                                                                                                                                                                                                                                                    |
| 4   | Most posterior point of the lateral condyle of the quadrate (if the quadrate is covered by the quadratojugal, the most posterior point of the posteroventral corner of the quadratojugal is chosen).                                                                                                                                                                                                                                                                                                                                                                        |
| 5   | The most posterodorsal point of the subnarial process of the premaxilla and the maxilla. (The position of this landmark in the reconstruction of <i>Yinlong</i> based on personal observations).                                                                                                                                                                                                                                                                                                                                                                            |
| 6   | The most posterior point of the ascending process of the maxilla along the dorsal margin of the antorbital fenestra. If no antorbital fenestra is developed, the most anterodorsal contact between maxilla and lacrimal was marked.                                                                                                                                                                                                                                                                                                                                         |
| 7   | The most posterior point of the jugal process of the maxilla along the ventral margin of the antorbital fenestra. If no antorbital fenestra is developed, the most posteroventral contact between the maxilla and lacrimal was marked (The position of this landmark in the reconstruction of <i>Allosaurus</i> based on personal observations of various specimens of <i>Allosaurus</i> ).                                                                                                                                                                                 |
| 8   | The contact between jugal and lacrimal along the orbital margin (for <i>Azendohsaurus</i> , <i>Malawisuchus</i> , <i>Mariliasuchus</i> , <i>Protosuchus</i> and <i>Trilophosaurus</i> , the most anterior point of the jugal along the orbital margin was chosen as the lacrimal is excluded from the orbit. In contrast, for some phytosaurs the most ventral point of the lacrimal along the orbital margin was marked, as the jugal is excluded from the orbit. The position of the landmark in the reconstruction of <i>Scaphognathus</i> is based on Wellnhofer 1975). |
| 9   | Contact between jugal and postorbital along the orbital margin.                                                                                                                                                                                                                                                                                                                                                                                                                                                                                                             |
| 10  | The most dorsal point of the postorbital along the orbital margin.                                                                                                                                                                                                                                                                                                                                                                                                                                                                                                          |
| 11  | The contact between jugal and postorbital along the margin of the lateral temporal fenestra/opening. For <i>Simosuchus</i> we plotted the most dorsal contact of the jugal along the anterodorsal margin of the lateral temporal fenestra.                                                                                                                                                                                                                                                                                                                                  |
| 12  | The ventral contact between postorbital and squamosal (This contact is usually located along the dorsal margin of the lateral temporal fenestra/opening, but is different in some rhynchosaurs, aetosaurs, <i>Dakosaurus</i> , <i>Postosuchus</i> , <i>Protosuchus</i> and <i>Yinlong</i> ).                                                                                                                                                                                                                                                                                |
| 13  | The dorsal contact between postorbital and squamosal.                                                                                                                                                                                                                                                                                                                                                                                                                                                                                                                       |
| 14  | Most ventral contact between the posterior process of the squamosal and quadrate.                                                                                                                                                                                                                                                                                                                                                                                                                                                                                           |

|         |                                                                                                                                                                                                                                                                                                                                                                                                                                                           |
|---------|-----------------------------------------------------------------------------------------------------------------------------------------------------------------------------------------------------------------------------------------------------------------------------------------------------------------------------------------------------------------------------------------------------------------------------------------------------------|
| 15      | Contact between jugal and quadratojugal along the ventral margin of the lateral temporal fenestra (For those taxa where the fenestra is ventrally open due to a reduction of the quadratojugal, the most posterior point of the posterior process of the jugal was marked. In the reconstruction of <i>Dysalotosaurus</i> , we plotted this landmark at the most posterior point of the jugal along the ventral margin of the lateral temporal fenestra). |
| S16-S17 | Two semi-landmarks between LM1 and LM2 along the ventral margin of the premaxilla.                                                                                                                                                                                                                                                                                                                                                                        |
| S18-S20 | Three semi-landmarks between LM2 and LM3 along the ventral margin of the maxilla.                                                                                                                                                                                                                                                                                                                                                                         |
| S21-S35 | 15 semi-landmarks between LM1 and LM14 along the dorsal margin of the skull                                                                                                                                                                                                                                                                                                                                                                               |
| S36-S38 | Four semi-landmarks between LM6 and LM7 along the anterior and posterior margin of the antorbital fenestra. In taxa lacking an antorbital fenestra, the semi-landmarks are placed along the suture contact of maxilla and lacrimal (Fig. S1).                                                                                                                                                                                                             |
| S39-S43 | Four semi-landmarks between LM8 and LM10 along the anterodorsal margin of the orbit.                                                                                                                                                                                                                                                                                                                                                                      |
| S44-S45 | Two semi-landmarks between LM10 and LM9 along the posterior margin of the orbit.                                                                                                                                                                                                                                                                                                                                                                          |
| S46     | One semi-landmark between LM8 and LM9 along the ventral margin of the orbit.                                                                                                                                                                                                                                                                                                                                                                              |
| S47-S48 | Two semi-landmarks between LM11 and LM15 along the anteroventral margin of the lateral temporal opening.                                                                                                                                                                                                                                                                                                                                                  |
| S49-S53 | Five semi-landmarks between LM12 and LM14 along the ventral margin of the squamosal.                                                                                                                                                                                                                                                                                                                                                                      |

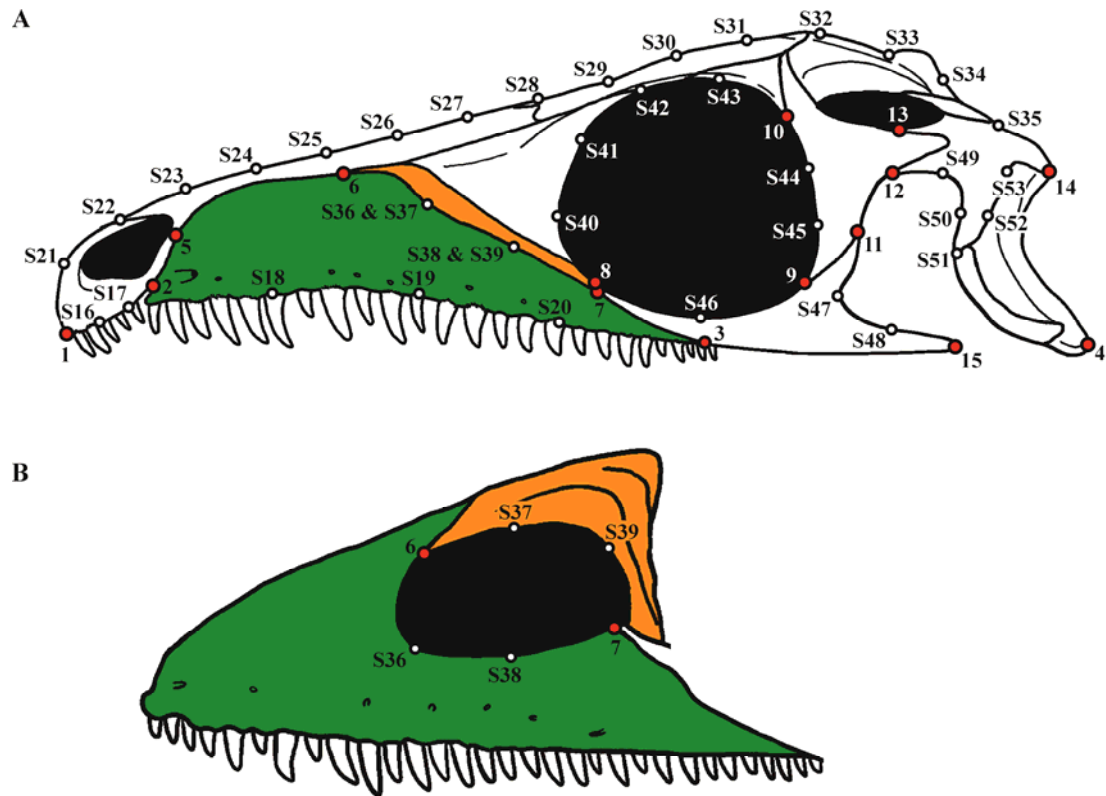

**Figure S1.** Distribution of landmarks and semi-landmarks. **(A)** Skull reconstruction of *Prolacerta broomi* in lateral view. Due to the absence of an antorbital fenestra the semi-landmarks S36 to S39 are placed along the suture contact of maxilla (green) and lacrimal (orange). **(B)** Reconstruction of maxilla (green) and lacrimal (orange) in anatomical position of *Proterosuchus fergusi* in lateral view showing the position of semi-landmarks S36 to S39 when an antorbital fenestra is present. All reconstructions are modified after Ezcurra and Butler (2015).

### 3. Phylogeny

To reconstruct ancestral shapes, we created two informal, time-calibrated supertrees based on recent literature. The main topology was based on Nesbitt (2011), but for one tree the position of phytosaurs were placed within crown Archosauria (Sereno 1991; Brusatte et al. 2010; Ezcurra 2016), while in the other phytosaurs are treated as non-archosaurian archosauromorphs following Nesbitt (2011). The sources of the phylogenetic positions of taxa not included in the analyses of Nesbitt (2011) are listed in Table S5.

**Table S5.** Sources for phylogenetic position of taxa included in the informal supertree.

| Species                              | Clade             | Source of Phylogeny             |
|--------------------------------------|-------------------|---------------------------------|
| <i>Langobardisaurus pandolfii</i>    | 'Protorosauria'   | Pritchard et al. 2015           |
| <i>Protorosaurus speneri</i>         | 'Protorosauria'   | Gottman-Quesada and Sander 2009 |
| <i>Tanystropheus longobardicus</i>   | 'Protorosauria'   | Ezcurra et al. 2014             |
| <i>Prolacerta broomi</i>             | Prolacertidae     | Ezcurra et al. 2014             |
| <i>Proterosuchus fergusi</i>         | Proterosuchidae   | Ezcurra et al. 2014             |
| <i>Proterosuchus alexanderi</i>      | Proterosuchidae   | Ezcurra et al. 2014             |
| <i>Proterosuchus goweri</i>          | Proterosuchidae   | Ezcurra et al. 2014             |
| <i>Trilophosaurus buettneri</i>      | Allokotosauria    | Ezcurra et al. 2014             |
| <i>Azendohsaurus madagaskarensis</i> | Allokotosauria    | Nesbitt et al. 2013             |
| <i>Bentonyx sidensis</i>             | Rhynchosauria     | Langer et al. 2010              |
| <i>Hyperodapedon gordoni</i>         | Rhynchosauria     | Langer and Schultz 2000         |
| <i>Hyperodapedon huxleyi</i>         | Rhynchosauria     | Hone and Benton 2008            |
| <i>Hyperodapedon sanjuanensis</i>    | Rhynchosauria     | Hone and Benton 2008            |
| <i>Mesosuchus browni</i>             | Rhynchosauria     | Hone and Benton 2008            |
| <i>Rhynchosaurus articeps</i>        | Rhynchosauria     | Hone and Benton 2008            |
| <i>Rhynchosaurus brodiei</i>         | Rhynchosauria     | Hone and Benton 2008            |
| <i>Teyumbaita sulcognathus</i>       | Rhynchosauria     | Hone and Benton 2008            |
| <i>Garjainia prima</i>               | Erythrosuchidae   | Pers. obs.                      |
| <i>Shansisuchus shansisuchus</i>     | Erythrosuchidae   | Gower and Sennikov 1996         |
| <i>Gualosuchus reigi</i>             | Proterochampsidae | Dilkes and Arcucci 2012         |
| <i>Smilosuchus gregorii</i>          | Phytosauria       | Stocker 2010                    |

|                                          |                 |                                            |
|------------------------------------------|-----------------|--------------------------------------------|
| <i>Brachysuchus megalodon</i>            | Phytosauria     | Stocker 2010                               |
| <i>Leptosuchus adamanensis</i>           | Phytosauria     | Stocker 2010                               |
| <i>Leptosuchus studeri</i>               | Phytosauria     | Stocker 2010                               |
| <i>Mystriosuchus planirostris</i>        | Phytosauria     | Parker and Irmis 2006                      |
| <i>Mystriosuchus westphali</i>           | Phytosauria     | Parker and Irmis 2006                      |
| <i>Nicrosaurus kapffi</i>                | Phytosauria     | Parker and Irmis 2006                      |
| <i>Pseudopalatus pristinus</i>           | Phytosauria     | Parker and Irmis 2006                      |
| <i>Gracilisuchus stipanicicorum</i>      | Suchia          | Butler et al. 2014                         |
| <i>Desmatosuchus smalli</i>              | Aetosauria      | Desojo et al. 2012                         |
| <i>Stagonolepis robertsoni</i>           | Aetosauria      | Desojo et al. 2012                         |
| <i>Stagonolepis olenkae</i>              | Aetosauria      | Desojo et al. 2012                         |
| <i>Neoaetosauroides engaeus</i>          | Aetosauria      | Desojo et al. 2012                         |
| <i>Aetosaurus ferratus</i>               | Aetosauria      | Desojo et al. 2012                         |
| <i>Revueletosaurus callenderi</i>        | Aetosauria      | Desojo et al. 2012                         |
| <i>Stenomyti huangae</i>                 | Aetosauria      | Small and Martz 2013                       |
| <i>Dakosaurus andiniensis</i>            | Crocodylomorpha | Bronzati et al. 2012                       |
| <i>Isisfordia duncani</i>                | Crocodylomorpha | Bronzati et al. 2012                       |
| <i>Leidyosuchus canadensis</i>           | Crocodylomorpha | Bronzati et al. 2012                       |
| <i>Pelagosaurus typus</i>                | Crocodylomorpha | Bronzati et al. 2012                       |
| <i>Sarcosuchus imperator</i>             | Crocodylomorpha | Bronzati et al. 2012                       |
| <i>Araripesuchus wegeneri</i>            | Crocodylomorpha | Pol et al. 2014; Sertich and O'Connor 2014 |
| <i>Campinasuchus dinizi</i>              | Crocodylomorpha | Pol et al. 2014                            |
| <i>Gobiosuchus kielanae</i>              | Crocodylomorpha | Pol et al. 2014; Sertich and O'Connor 2014 |
| <i>Hamadasuchus rebouli</i>              | Crocodylomorpha | Pol et al. 2014; Sertich and O'Connor 2014 |
| <i>Kaprosuchus saharicus</i>             | Crocodylomorpha | Pol et al. 2014; Sertich and O'Connor 2014 |
| <i>Mahajangasuchus insignis</i>          | Crocodylomorpha | Pol et al. 2014; Sertich and O'Connor 2014 |
| <i>Malawisuchus mwakasyungutiensis</i>   | Crocodylomorpha | Pol et al. 2014; Sertich and O'Connor 2014 |
| <i>Mariliasuchus amarali</i>             | Crocodylomorpha | Pol et al. 2014; Sertich and O'Connor 2014 |
| <i>Montealtosuchus arrudacamposi</i>     | Crocodylomorpha | Pol et al. 2014; Sertich and O'Connor 2014 |
| <i>Notosuchus terrestris</i>             | Crocodylomorpha | Pol et al. 2014; Sertich and O'Connor 2014 |
| <i>Simosuchus clarki</i>                 | Crocodylomorpha | Pol et al. 2014; Sertich and O'Connor 2014 |
| <i>Anatosuchus minor</i>                 | Crocodylomorpha | Sertich and O'Connor 2014                  |
| <i>Eudimorphodon ranzii</i>              | Pterosauria     | Andres and Myers 2013                      |
| <i>Campylognathoides spp.</i>            | Pterosauria     | Andres and Myers 2013                      |
| <i>Dorygnathus banthensis</i>            | Pterosauria     | Andres and Myers 2013                      |
| <i>Scaphognathus crassirostris</i>       | Pterosauria     | Andres and Myers 2013                      |
| ' <i>Syntarsus</i> ' <i>kayentakatae</i> | Theropoda       | Sues et al. 2011                           |
| <i>Zupaysaurus rougieri</i>              | Theropoda       | Sues et al. 2011                           |
| <i>Monolophosaurus jiangi</i>            | Theropoda       | Carrano et al. 2012                        |



|                                      |                 |                      |
|--------------------------------------|-----------------|----------------------|
| <i>Allosaurus fragilis</i>           | Theropoda       | Carrano et al. 2012  |
| <i>Sinraptor dongi</i>               | Theropoda       | Carrano et al. 2012  |
| <i>Archaeopteryx lithographica</i>   | Theropoda       | Foth et al. 2014     |
| <i>Compsognathus longipes</i>        | Theropoda       | Foth et al. 2014     |
| <i>Guanlong wucaii</i>               | Theropoda       | Foth et al. 2014     |
| <i>Haplocheirus sollers</i>          | Theropoda       | Foth et al. 2014     |
| <i>Ceratosaurus nasicornis</i>       | Theropoda       | Pol and Rauhut 2012  |
| <i>Limusaurus inextricabilis</i>     | Theropoda       | Pol and Rauhut 2012  |
| <i>Adeopapposaurus mognai</i>        | Sauropodomorpha | Martínez 2009        |
| <i>Eoraptor lunensis</i>             | Sauropodomorpha | Martínez et al. 2013 |
| <i>Pampadromaeus barberenai</i>      | Sauropodomorpha | Martínez et al. 2013 |
| <i>Jingshanosaurus xinwaensis</i>    | Sauropodomorpha | Yates 2007           |
| <i>Massospondylus carinatus</i>      | Sauropodomorpha | Yates 2007           |
| <i>Melanorosaurus readi</i>          | Sauropodomorpha | Yates 2007           |
| <i>Plateosaurus</i> spp.             | Sauropodomorpha | Yates 2007           |
| <i>Unaysaurus tolentinoi</i>         | Sauropodomorpha | Yates 2007           |
| <i>Shunosaurus lii</i>               | Sauropodomorpha | Wilson 2002          |
| <i>Mamenchisaurus youngi</i>         | Sauropodomorpha | Wilson 2002          |
| <i>Diplodocus</i> spp.               | Sauropodomorpha | Wilson 2002          |
| <i>Camarasaurus lentus</i>           | Sauropodomorpha | Wilson 2002          |
| <i>Giraffatitan brancai</i>          | Sauropodomorpha | Wilson 2002          |
| <i>Lesothosaurus diagnosticus</i>    | Ornithischia    | Butler et al. 2010   |
| <i>Heterodontosaurus tucki</i>       | Ornithischia    | Butler et al. 2010   |
| <i>Emausaurus ernsti</i>             | Ornithischia    | Butler et al. 2010   |
| <i>Huayangosaurus taibaii</i>        | Ornithischia    | Maidment et al. 2008 |
| <i>Stegosaurus stenops</i>           | Ornithischia    | Maidment et al. 2008 |
| <i>Dysalotosaurus lettowvorbecki</i> | Ornithischia    | McDonald et al. 2010 |
| <i>Agilisaurus louderbacki</i>       | Ornithischia    | Butler et al. 2010   |
| <i>Yinlong downsi</i>                | Ornithischia    | Butler et al. 2010   |
| <i>Camptosaurus dispar</i>           | Ornithischia    | Butler et al. 2010   |
| <i>Psittacosaurus mongoliensis</i>   | Ornithischia    | Butler et al. 2010   |

The correlation between shape and phylogeny was tested using multivariate K statistics on the basis of Procrustes-fitted landmark coordinates using the program R (R Development Core Team) and the package geomorph (Adams and Otárola-Castillo 2013). This method estimates the strength of a phylogenetic signal in a data set in relation to a simulated Brownian motion model and was performed with 1,000 replications (Blomberg et al., 2003; Paradis, 2012; Adams, 2014). The strength of the phylogenetic signal is expressed as K and p-values. The test reveals that skull shape of archosauromorphs correlates significantly with phylogeny, while the position of phytosaurs has no impact on the signal (Table S6). However, the K-value  $< 1$  implies that the skull shapes of the terminal taxa resemble each other less than expected under Brownian motion evolution (Blomberg et al., 2003). To confirm these results we performed an additional permutation test in MorphoJ (Klingenberg 2011), shuffling the Procrustes-fitted landmark coordinates of each taxon randomly across the tree (10,000 times), while the topology is held constant (Laurin 2004; Klingenberg and Gidaszewski 2010). As found using K statistics, cranial shape correlates significantly with phylogeny as the squared length of the original supertree (= tree length) occurs in over 95% of the randomly generated trees (Fig. S3; Table S6).

**Table S6.** Strength of the phylogenetic signal of the skull shape of Archosauromorpha.

|                             | <b>K</b> | <b>p-value</b> | <b>Tree length</b> | <b>p-value</b> |
|-----------------------------|----------|----------------|--------------------|----------------|
| <b>Phytosauria as crown</b> | 0.079    | 0.001          | 3.431              | <0.001         |
| <b>Phytosauria as stem</b>  | 0.079    | 0.001          | 3.429              | <0.001         |

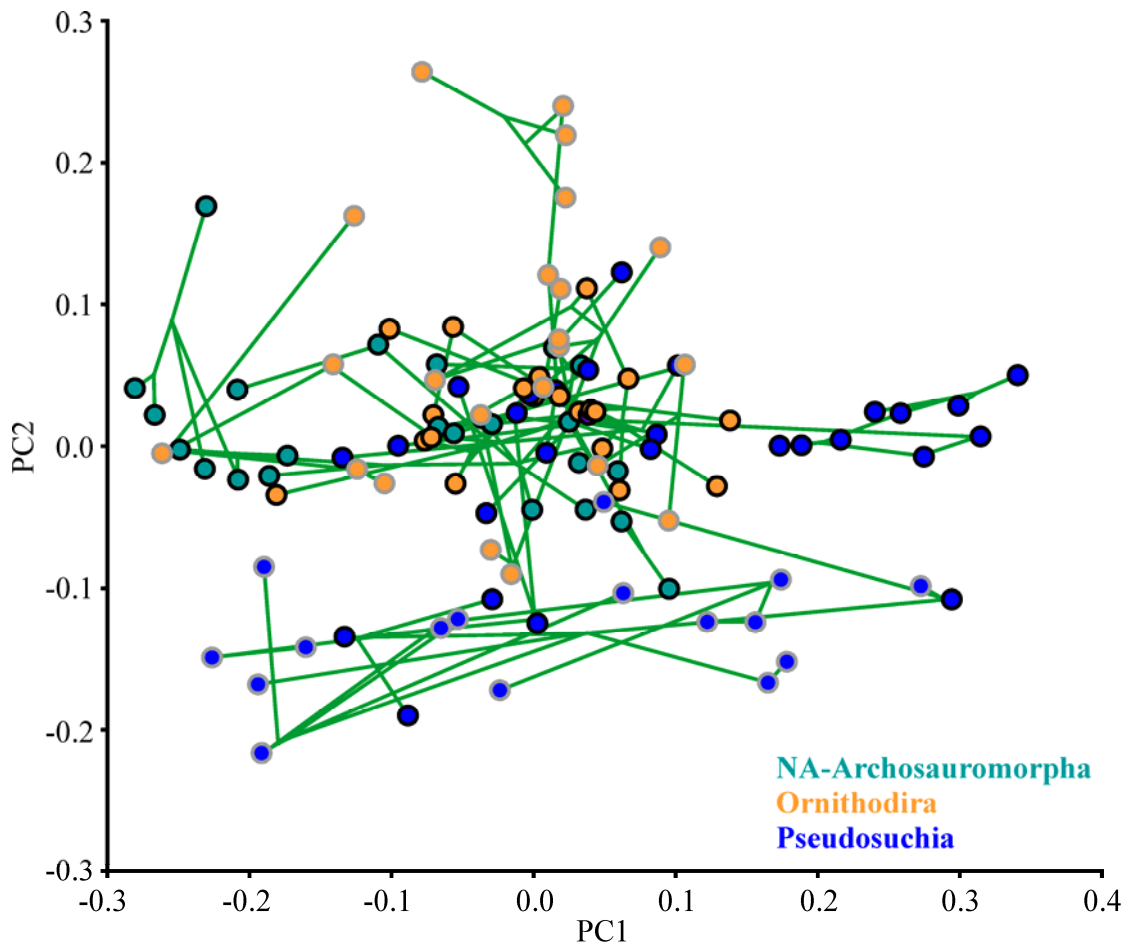

**Figure S2.** Morphospace of archosauromorphs, including post-Early Jurassic pseudosuchians (blue circle with grey outline) and ornithodirans (orange circle with grey outline), which were used specifically to trace ancestral shapes of archosaurs for the Early Jurassic period. Archosauromorphs living from the Permian to the end of Early Jurassic are marked with black outlines.

## 5. Disparity and NPMANOVA results

**Table S7.** Sum of variances of Archosauromorpha through time. The values for ornithodirans and dinosaurs are not affected by the phylogenetic position of phytosaurs. NA = non-archosaurian. Numbers in brackets show the sample size for each group per bin.

|                                  | <b>all Archosauromorpha</b> | <b>Ornithodira</b> | <b>Dinosauria</b>   |
|----------------------------------|-----------------------------|--------------------|---------------------|
| <b>PERMIAN (PE)</b>              | 0.0023 (7)                  | -                  | -                   |
| <b>EARLY TRIASSIC (ET)</b>       | 0.0041 (20)                 | -                  | -                   |
| <b>ANISIAN (ANI)</b>             | 0.0217 (14)                 | -                  | -                   |
| <b>LADINIAN (LAD)</b>            | 0.0147 (11)                 | -                  | -                   |
| <b>CARNIAN (CAR)</b>             | 0.0415 (27)                 | 0.0031 (9)         | 0.0031 (9)          |
| <b>NORIAN1 (NOR1)</b>            | 0.0365 (17)                 | 0.0035 (6)         | 0.0035 (6)          |
| <b>NORIAN2 (NOR2)</b>            | 0.0362 (30)                 | 0.0081 (11)        | 0.0068 (9)          |
| <b>HETTANGIAN (HET)</b>          | 0.0118 (5)                  | -                  | -                   |
| <b>SINEMURIAN (SIN)</b>          | 0.0267 (14)                 | 0.0222 (9)         | 0.0222 (9)          |
| <b>TOARCIAN (TOA)</b>            | 0.0326 (8)                  | 0.0121 (5)         | -                   |
| <b>Phytosaurs as crown group</b> | <b>NA-Archosauromorpha</b>  | <b>Archosauria</b> | <b>Pseudosuchia</b> |
| <b>PERMIAN (PE)</b>              | 0.0023 (7)                  | -                  | -                   |
| <b>EARLY TRIASSIC (ET)</b>       | 0.0053 (13)                 | 0.0000 (7)         | 0.0000 (6)          |
| <b>ANISIAN (ANI)</b>             | 0.0188 (12)                 | -                  | -                   |
| <b>LADINIAN (LAD)</b>            | 0.0207 (5)                  | 0.0068 (6)         | 0.0068 (6)          |
| <b>CARNIAN (CAR)</b>             | 0.0064 (6)                  | 0.0176 (21)        | 0.0180 (12)         |
| <b>NORIAN1 (NOR1)</b>            | -                           | 0.0290 (16)        | 0.0287 (10)         |
| <b>NORIAN2 (NOR2)</b>            | 0.0282 (NOR1+NOR2) (3)      | 0.0345 (28)        | 0.0431 (17)         |
| <b>HETTANGIAN (HET)</b>          | -                           | 0.0118 (5)         | 0.0001 (4)          |
| <b>SINEMURIAN (SIN)</b>          | -                           | 0.0267 (14)        | 0.0089 (5)          |
| <b>TOARCIAN (TOA)</b>            | -                           | 0.0326 (8)         | 0.0000 (3)          |
| <b>Phytosaurs as stem group</b>  | <b>NA-Archosauromorpha</b>  | <b>Archosauria</b> | <b>Pseudosuchia</b> |
| <b>PERMIAN (PE)</b>              | 0.0023 (7)                  | -                  | -                   |
| <b>EARLY TRIASSIC (ET)</b>       | 0.0051 (14)                 | 0.0000 (6)         | 0.0000 (5)          |
| <b>ANISIAN (ANI)</b>             | 0.0188 (12)                 | -                  | -                   |
| <b>LADINIAN (LAD)</b>            | 0.0207 (5)                  | 0.0068 (6)         | 0.0068 (6)          |
| <b>CARNIAN (CAR)</b>             | 0.0815 (8)                  | 0.0076 (19)        | 0.0044 (10)         |
| <b>NORIAN1 (NOR1)</b>            | 0.0317 (8)                  | 0.0106 (9)         | 0.0000 (3)          |
| <b>NORIAN2 (NOR2)</b>            | 0.0398 (10)                 | 0.0153 (20)        | 0.0171 (9)          |
| <b>HETTANGIAN (HET)</b>          | -                           | 0.0118 (5)         | 0.0001 (4)          |
| <b>SINEMURIAN (SIN)</b>          | -                           | 0.0267 (14)        | 0.0089 (5)          |
| <b>TOARCIAN (TOA)</b>            | -                           | 0.0326 (8)         | 0.0000 (3)          |

**Table S8.** Statistical differences of sum of variances and morphospace position between subsequent time bins for all Archosauromorpha. Bold p-values represent significant results.

|           | Sum of Variance |               | NPMANOVA |               |
|-----------|-----------------|---------------|----------|---------------|
|           | Difference      | p-value       | F        | p-value       |
| PE-ET     | 0.0018          | 0.4041        | 6.9180   | <b>0.0495</b> |
| ET-ANI    | 0.0176          | <b>0.0002</b> | 16.9400  | <b>0.0045</b> |
| ANI-LAD   | -0.0070         | 0.0717        | 3.85900  | 0.9180        |
| LAD-CAR   | 0.0268          | 0.0870        | 0.9132   | 1.0000        |
| CAR-NOR1  | -0.0050         | 0.7068        | 4.6600   | 0.4860        |
| NOR1-NOR2 | -0.0004         | 0.9720        | 0.9306   | 1.0000        |
| NOR2-HET  | -0.0243         | 0.1264        | 8.2920   | 0.0765        |
| HET-SIN   | 0.0149          | <b>0.0342</b> | 3.4680   | 1.0000        |
| SIN-TOA   | 0.0059          | 0.6516        | 6.6270   | <b>0.0360</b> |

**Table S9.** Statistical differences of sum of variances and morphospace position between subsequent time bins for non-archosaurian Archosauromorpha. Bold p-values represent significant results.

|                             | Sum of Variance |               | NPMANOVA |               |
|-----------------------------|-----------------|---------------|----------|---------------|
|                             | Difference      | p-value       | F        | p-value       |
| <b>Phytosauria as crown</b> |                 |               |          |               |
| PE-ET                       | 0.0030          | 0.2364        | 7.0960   | <b>0.0390</b> |
| ET-ANI                      | 0.0135          | <b>0.0011</b> | 17.3400  | <b>0.0015</b> |
| ANI-LAD                     | 0.0019          | 0.7939        | 3.7280   | 0.4110        |
| LAD-CAR                     | -0.0143         | 0.3878        | 23.2200  | <b>0.0435</b> |
| CAR-NOR (NOR1+NOR2)         | 0.0218          | 0.1881        | 4.8530   | 0.1830        |
| <b>Phytosauria as stem</b>  |                 |               |          |               |
| PE-ET                       | 0.0028          | 0.2675        | 7.1040   | <b>0.0294</b> |
| ET-ANI                      | 0.0138          | <b>0.0015</b> | 19.6300  | <b>0.0021</b> |
| ANI-LAD                     | 0.0019          | 0.7950        | 3.7280   | 0.5712        |
| LAD-CAR                     | 0.0607          | <b>0.0287</b> | 2.1510   | 1.0000        |
| CAR-NOR1                    | -0.0497         | <b>0.0001</b> | 7.0120   | 0.7371        |
| NOR1-NOR2                   | 0.0081          | 0.7470        | 0.4481   | 1.0000        |

**Table S10.** Sum of variances of non-archosauriform (NAF-) Archosauromorpha and non-archosaurian (NA-) Archosauriformes through time.

| <b>Phytosaurs as crown group</b> | <b>NAF-Archosauromorpha</b> | <b>NA-Archosauriformes</b> |
|----------------------------------|-----------------------------|----------------------------|
| PERMIAN (PE)                     | 0.0025                      | -                          |
| EARLY TRIASSIC (ET)              | -                           | 0.0026                     |
| ANISIAN (ANI)                    | 0.0125                      | 0.0126                     |
| LADINIAN (LAD)                   | -                           | 0.0013                     |
| CARNIAN (CAR)                    | 0.0064                      | -                          |
| <b>Phytosaurs as stem group</b>  | <b>NAF-Archosauromorpha</b> | <b>NA-Archosauriformes</b> |
| PERMIAN (PE)                     | 0.0025                      | -                          |
| EARLY TRIASSIC (ET)              | -                           | 0.0026                     |
| ANISIAN (ANI)                    | 0.0125                      | 0.0126                     |
| LADINIAN (LAD)                   | -                           | 0.0012                     |
| CARNIAN (CAR)                    | 0.0064                      | -                          |
| NORIAN1 (NOR1)                   | -                           | 0.0022                     |
| NORIAN2 (NOR2)                   | -                           | 0.0062                     |

**Table S11.** Statistical differences of sum of variances and morphospace position between subsequent time bins for non-archosauriform (NAF-) Archosauromorpha and non-archosaurian (NA-) Archosauriformes when phytosaurs are members of the crown-group of Archosauria. Bold p-values represent significant results.

|                             | Sum of Variance |               | NPMANOVA |               |
|-----------------------------|-----------------|---------------|----------|---------------|
|                             | Difference      | p-value       | F        | p-value       |
| <b>NAF-Archosauromorpha</b> |                 |               |          |               |
| PE- ANI                     | 0.0100          | <b>0.0240</b> | 17.9200  | <b>0.0048</b> |
| ANI-CAR                     | -0.0061         | 0.5579        | 16.9000  | <b>0.0069</b> |
| <b>NA-Archosauriformes</b>  |                 |               |          |               |
| ET-ANI                      | 0.0100          | <b>0.0234</b> | 4.6460   | <b>0.0054</b> |
| ANI-LAD                     | -0.0113         | 0.1972        | 7.1130   | 0.3048        |

**Table S12.** Statistical differences of sum of variances and morphospace position between subsequent time bins for non-archosauriform (NAF-) Archosauromorpha and non-archosaurian (NA-) Archosauriformes when phytosaurs are members of the stem-line of Archosauria. Bold p-values represent significant results.

|                             | Sum of Variance |               | NPMANOVA |               |
|-----------------------------|-----------------|---------------|----------|---------------|
|                             | Difference      | p-value       | F        | p-value       |
| <b>NAF-Archosauromorpha</b> |                 |               |          |               |
| PE- ANI                     | 0.0100          | <b>0.0271</b> | 17.9200  | <b>0.0048</b> |
| ANI-CAR                     | -0.0061         | 0.5574        | 16.9000  | <b>0.0069</b> |
| <b>NA-Archosauriformes</b>  |                 |               |          |               |
| ET-ANI                      | 0.0100          | <b>0.0148</b> | 4.5880   | <b>0.0350</b> |
| ANI-LAD                     | -0.0113         | 0.1995        | 7.1130   | 1.0000        |
| LAD -NOR1                   | 0.0010          | 0.2452        | 59.4100  | <b>0.0920</b> |
| NOR1-NOR2                   | 0.0039          | 0.1104        | 1.8820   | 1.0000        |

**Table S13.** Statistical differences of sum of variances and morphospace position between subsequent time bins for Archosauria. Bold p-values represent significant results.

|                             | Sum of Variance |               | NPMANOVA |               |
|-----------------------------|-----------------|---------------|----------|---------------|
|                             | Difference      | p-value       | F        | p-value       |
| <b>Phytosauria as crown</b> |                 |               |          |               |
| ET-LAD                      | 0.0067          | <b>0.0003</b> | 8.2230   | 0.1372        |
| LAD-CAR                     | 0.0108          | 0.5922        | 3.1740   | 1.0000        |
| CAR-NOR1                    | 0.0113          | 0.1035        | 4.8790   | 0.4620        |
| NOR1-NOR2                   | 0.0055          | 0.3742        | 0.8775   | 1.0000        |
| NOR2-HET                    | -0.0226         | 0.1507        | 9.4540   | <b>0.0196</b> |
| HET-SIN                     | 0.0149          | <b>0.0367</b> | 3.4680   | 0.7643        |
| SIN-TOA                     | 0.0059          | 0.6574        | 6.6270   | <b>0.0280</b> |
| <b>Phytosauria as stem</b>  |                 |               |          |               |
| ET-LAD                      | 0.0067          | <b>0.0013</b> | 6.8150   | 0.4592        |
| LAD-CAR                     | 0.0008          | 0.6504        | 4.5100   | 0.1596        |
| CAR-NOR1                    | 0.0030          | 0.1618        | 4.7660   | 0.0728        |
| NOR1-NOR2                   | 0.0047          | 0.2585        | 2.2570   | 1.0000        |
| NOR2-HET                    | -0.0035         | 0.7053        | 14.0200  | <b>0.0056</b> |
| HET-SIN                     | 0.0149          | <b>0.0355</b> | 3.4680   | 0.7027        |
| SIN-TOA                     | 0.0059          | 0.6568        | 6.6270   | <b>0.0168</b> |

**Table S14.** Statistical differences of sum of variances and morphospace position between subsequent time bins for Pseudosuchia. Bold p-values represent significant results.

|                             | Sum of Variance |                 | NPMANOVA |               |
|-----------------------------|-----------------|-----------------|----------|---------------|
|                             | Difference      | p-value         | F        | p-value       |
| <b>Phytosauria as crown</b> |                 |                 |          |               |
| <b>ET-LAD</b>               | 0.0068          | <b>0.0019</b>   | 6.9330   | 0.4368        |
| <b>LAD-CAR</b>              | 0.0112          | 0.6098          | 6.1220   | 0.1176        |
| <b>CAR-NOR1</b>             | 0.0107          | 0.0921          | 4.5650   | 0.8427        |
| <b>NOR1-NOR2</b>            | 0.0144          | 0.1099          | 1.2660   | 1.0000        |
| <b>NOR2-HET</b>             | -0.0430         | <b>0.0079</b>   | 9.0340   | <b>0.0168</b> |
| <b>HET-SIN</b>              | 0.0088          | <b>0.0180</b>   | 9.3810   | 0.4956        |
| <b>SIN-TOA</b>              | -0.0089         | 0.6786          | 35.4500  | 0.4424        |
| <b>Phytosauria as stem</b>  |                 |                 |          |               |
| <b>ET-LAD</b>               | 0.0068          | <b>0.001900</b> | 5.5630   | 0.4564        |
| <b>LAD-CAR</b>              | -0.0024         | 0.441700        | 9.2180   | <b>0.0224</b> |
| <b>CAR-NOR1</b>             | -0.0044         | 0.618500        | 22.4700  | 0.1148        |
| <b>NOR1-NOR2</b>            | 0.0171          | 0.102700        | 5.2420   | 0.1596        |
| <b>NOR2-HET</b>             | -0.0170         | 0.069800        | 14.7400  | <b>0.0336</b> |
| <b>HET-SIN</b>              | 0.0088          | <b>0.016000</b> | 9.3810   | 0.4760        |
| <b>SIN-TOA</b>              | -0.0089         | 0.900600        | 35.4500  | 0.5375        |

**Table S15.** Statistical differences of sum of variances and morphospace position between subsequent time bins for Ornithodira/Dinosauria. Bold p-values represent significant results.

|                    | Sum of Variance |               | NPMANOVA |               |
|--------------------|-----------------|---------------|----------|---------------|
|                    | Difference      | p-value       | F        | p-value       |
| <b>Ornithodira</b> |                 |               |          |               |
| <b>CAR-NOR1</b>    | 0.0004          | 0.8045        | 8.1730   | <b>0.0220</b> |
| <b>NOR1-NOR2</b>   | 0.0046          | 0.0822        | 0.5507   | 1.0000        |
| <b>NOR2-SIN</b>    | 0.0140          | <b>0.0299</b> | 3.7450   | 0.1870        |
| <b>SIN-TOA</b>     | -0.0100         | 0.2724        | 3.2080   | 0.2290        |
| <b>Dinosauria</b>  |                 |               |          |               |
| <b>CAR-NOR1</b>    | 0.0004          | 0.7908        | 8.1730   | <b>0.0114</b> |
| <b>NOR1-NOR2</b>   | 0.0033          | 0.2235        | 0.7489   | 1.0000        |
| <b>NOR2-SIN</b>    | 0.0154          | <b>0.0351</b> | 3.6580   | 0.1950        |



**Table S16.** Statistical differences of sum of variances and morphospace position between different groups within time bin when phytosaurs are crown-archosaurs.

Bold p-values represent significant results. NAF = non-archosauriform; NA = non-archosaurian.

| Phytosauria as crown                                | Sum of Variance |                    | NPMANOVA |               |
|-----------------------------------------------------|-----------------|--------------------|----------|---------------|
|                                                     | Difference      | p-value            | F        | p-value       |
| <b>NA-Archosauromorpha vs. Archosauria</b>          |                 |                    |          |               |
| EARLY TRIASSIC                                      | 0.0053          | <b>0.0315</b>      | 3.8020   | <b>0.0354</b> |
| LADINIAN                                            | 0.0140          | <b>0.0200</b>      | 2.3470   | 0.3189        |
| CARNIAN                                             | -0.0112         | 0.6621             | 45.2500  | <b>0.0010</b> |
| <b>NAF-Archosauromorpha vs. NA-Archosauriformes</b> |                 |                    |          |               |
| ANISIAN                                             | -0.0001         | 0.9834             | 6.5960   | <b>0.0051</b> |
| <b>NA-Archosauromorpha vs. Pseudosuchia</b>         |                 |                    |          |               |
| EARLY TRIASSIC                                      | 0.0053          | <b>0.0355</b>      | 3.3630   | 0.0642        |
| LADINIAN                                            | 0.0140          | <b>0.0149</b>      | 2.3470   | 0.3231        |
| CARNIAN                                             | -0.0116         | 0.6686             | 50.1200  | <b>0.0010</b> |
| <b>NA-Archosauromorpha vs. Ornithodira</b>          |                 |                    |          |               |
| CARNIAN                                             | 0.0033          | 0.7244             | 100.4000 | <b>0.0020</b> |
| <b>Pseudosuchia vs. Ornithodira</b>                 |                 |                    |          |               |
| CARNIAN                                             | 0.0149          | 0.4270             | 11.0200  | <b>0.0010</b> |
| NORIAN1                                             | 0.0252          | <b>0.0002</b>      | 8.0490   | <b>0.0168</b> |
| NORIAN2                                             | 0.0349          | <b>&lt; 0.0001</b> | 5.4060   | <b>0.0330</b> |
| SINEMURIAN                                          | -0.0133         | 0.1795             | 7.5870   | <b>0.0012</b> |
| TOARCIAN                                            | -0.0121         | 0.4856             | 22.2400  | <b>0.0190</b> |

**Table S17.** Statistical differences of sum of variances and morphospace position between different groups within time bin when phytosaurs are stem-archosaurs. Bold p-values represent significant results. NAF = non-archosauriform; NA = non-archosaurian.

| Phytosaurs as stem                                  | Sum of Variance |                    | NPMANOVA |               |
|-----------------------------------------------------|-----------------|--------------------|----------|---------------|
|                                                     | Difference      | p-value            | F        | p-value       |
| <b>NA-Archosauromorpha vs. Archosauria</b>          |                 |                    |          |               |
| <b>EARLY TRIASSIC</b>                               | 0.0050          | <b>0.0433</b>      | 3.0990   | 0.0849        |
| <b>LADINIAN</b>                                     | 0.0140          | <b>0.0177</b>      | 2.3470   | 0.3186        |
| <b>CARNIAN</b>                                      | 0.0739          | <b>&lt; 0.0001</b> | 13.1600  | <b>0.0020</b> |
| <b>NORIAN1</b>                                      | 0.0211          | 0.1338             | 13.5700  | <b>0.0060</b> |
| <b>NORIAN2</b>                                      | 0.0245          | 0.0058             | 17.1800  | <b>0.0010</b> |
| <b>NAF-Archosauromorpha vs. NA-Archosauriformes</b> |                 |                    |          |               |
| <b>ANISIAN</b>                                      | 0.0001          | 0.9870             | 6.5960   | <b>0.0044</b> |
| <b>NA-Archosauromorpha vs. Pseudosuchia</b>         |                 |                    |          |               |
| <b>EARLY TRIASSIC</b>                               | 0.0050          | 0.0555             | 2.7050   | 0.1503        |
| <b>LADINIAN</b>                                     | 0.0140          | <b>0.0144</b>      | 2.3470   | 0.3246        |
| <b>CARNIAN</b>                                      | 0.0771          | <b>&lt; 0.0001</b> | 8.9560   | <b>0.0420</b> |
| <b>NORIAN1</b>                                      | 0.0317          | 0.4941             | 8.4390   | 0.2670        |
| <b>NORIAN2</b>                                      | 0.0228          | <b>0.0286</b>      | 11.7100  | <b>0.0180</b> |
| <b>NA-Archosauromorpha vs. Ornithodira</b>          |                 |                    |          |               |
| <b>CARNIAN</b>                                      | 0.0784          | <b>0.0002</b>      | 6.6580   | 0.0610        |
| <b>NORIAN1</b>                                      | 0.0282          | <b>0.0452</b>      | 10.6200  | <b>0.0460</b> |
| <b>NORIAN2</b>                                      | 0.0317          | <b>0.0005</b>      | 12.7700  | <b>0.0110</b> |
| <b>Pseudosuchia vs. Ornithodira</b>                 |                 |                    |          |               |
| <b>CARNIAN</b>                                      | 0.0013          | 0.3593             | 19.2600  | <b>0.0010</b> |
| <b>NORIAN1</b>                                      | -0.0035         | 0.4831             | 26.9500  | 0.1280        |
| <b>NORIAN2</b>                                      | 0.0089          | 0.0502             | 6.0580   | <b>0.0010</b> |
| <b>SINEMURIAN</b>                                   | -0.0133         | 0.1766             | 7.5870   | <b>0.0009</b> |
| <b>TOARCIAN</b>                                     | -0.0121         | 0.4835             | 22.2400  | <b>0.0149</b> |

## 5. Additional results and discussion points

### 5.1. General disparity trend within archosauromorph cranium

The current study shows that after the end-Permian mass extinction, cranial disparity of archosauromorphs increased slowly during the Early Triassic, which is in agreement with a general delayed recovery of ecosystems and taxon diversity after the extinction event (Irmis and Whiteside 2012; Lau et al. 2016). However, the shift in morphospace (Table S8) already indicates an initial diversification of archosauromorphs starting in the Early Triassic. The Anisian peak, which corresponds to a shift in morphospace, is evidence of an abrupt radiation of archosauromorphs (including crown archosaurs), beginning in the Middle Triassic and continuing until the end of the Late Triassic (Nesbitt 2011, Sidor et al. 2013) leading to a diversification of cranial morphologies including taxa with long (e.g. Phytosauria, Coelophysidae, Thalattosuchia, Protochampsidae) and short (e.g. Rhynchosauria, Heterodontosauridae, *Lotosaurus*) snouts. When compared to each other, non-archosauriform archosauromorphs are similar in cranial disparity to non-archosaurian archosauriforms during the Anisian, but occupy different regions in morphospace (Table S16, S17), supporting a process of radiation during the Middle Triassic. This radiation corresponded also with an increase in body size (Sookias et al. 2012a,b) and reveals an ecological diversification into different niches and probable dietary preferences, including piscivory (e.g. Phytosauria, Proterochampsia), omnivory (basal Sauropodomorpha, Aetosauria), carnivory (e.g. Rautisuchidae, Theropoda) and herbivory (e.g. Rhynchosauria, Ornithischia) (see Butler et al. 2011; Nesbitt et al. 2013). The mass extinction at the end of the Triassic resulted in a decrease in taxonomic diversity, including the extinction of all stem line archosaurs and all non-crocodylomorph pseudosuchians, which in turn led to a decrease in cranial disparity.

During their coexistence, the cranial morphospace of non-archosaurian archosauromorphs and archosaurs overlaps during the Ladinian (this result is found with both phylogenetic positions of phytosaurs, Table S16, S17). However, this overlap is not unambiguous evidence for ecological competition between the two groups during this period, but could also result from a statistical artefact as the crown group members in this time bin tend not to show extremes of skull shape (e.g. Gracilisuchidae and various basal Loricata), while the stem line representatives include taxa with short and high (Allokotosauria) and long and flattened skulls (Protochampsia), resulting in similar medians (centroids) in morphospace. However, whether this overlap is a real signal needs to be tested in the future with more detailed analyses including multiple lines of evidence.

## **5.2. The effect of the phylogenetic position of Phytosauria**

The disparity trajectories for non-archosaurian archosauromorphs are greatly affected by the phylogenetic position of Phytosauria. When phytosaurs are considered the sister-taxon of Archosauria (Nesbitt 2011), the cranial disparity of non-archosaurian archosauromorphs increases from the late Permian to the Carnian, in which the changes between the Ladinian and the Carnian are significant. After a Carnian peak their cranial disparity decreases significantly in the early Norian, but re-expands slightly in the late Norian, before the group goes extinct at the end of the Late Triassic (Table S9). In contrast, the cranial disparity of Archosauria increases from the Early Triassic until the late Norian. From the late Norian into the Hettangian cranial disparity decreases, and then it expands again until the Toarcian (Fig. S3, Table S13). The changes between the Hettangian and Sinemurian are significant. In this scenario, cranial disparity of non-archosaurian archosauromorphs is higher than that of

Archosauria throughout the interval over which they coexist, but only significantly higher from the Early Triassic to the Carnian (Table S17). Non-archosaurian archosauromorphs exhibit a significant shift in morphospace from the late Permian to the Early Triassic and from the Early Triassic to the Anisian (Table S9), while in Archosauria these shifts occur from the late Norian to the Hettangian and from the Sinemurian to the Toarcian (Table S13). When compared to each other, both groups are significantly separated from each other in morphospace over the entire Late Triassic (Fig. S4), but not in the Early and Middle Triassic (Table S17). In sum, if phytosaurs were stem-archosaurs, non-archosaurian archosauromorph disparity far exceeds that of Archosauria during the whole Triassic, before the sudden extinction of all non-crown taxa at the end of the Triassic. In addition, the cranial disparity of Pseudosuchia and Ornithodira would be relatively equal during the Late Triassic (Fig. S3), although both groups occupy different areas of morphospace (as found by Brusatte et al. 2008). In this scenario, the “true” radiation of crown archosaurs began following the end-Triassic extinction, precipitated by an increase of taxonomic and morphological diversity in Ornithodira. Thus, our view of the evolutionary radiation of Archosauria, pseudosuchians and ornithodirans in particular, is strongly affected by the inclusion or exclusion of phytosaurs within the crown. This in turn highlights the importance of phylogeny in understanding the early evolutionary history of Archosauria. As the most recent and taxonomically comprehensive (at least regarding stem-archosaurs) phylogenetic analysis favours the originally proposed relationship of phytosaurs as members of Pseudosuchia (Ezcurra 2016), the alternative disparity patterns of non-archosaurian archosauromorphs and archosaurs are presented in the main text. Nevertheless, as highlighted in the main text, the evolutionary patterns

described and discussed there are still valid for the paraphyletic group composed of non-archosaurian archosauromorphs to the exclusion of phytosaurs.

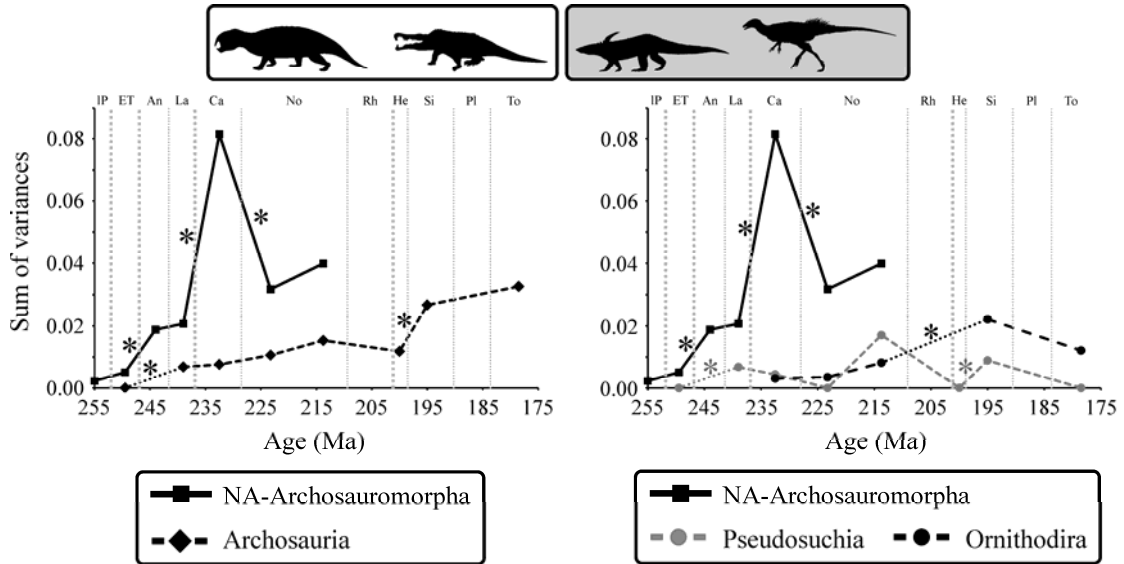

**Figure S3.** Disparity of archosauromorphs through time from the late Permian to the end of the Early Jurassic with phytosaurs as members of the stem group. Left: Temporal pattern of non-archosaurian archosauromorphs (solid line with black squares) and crown archosaurs (dashed line with black diamonds). Right: Temporal pattern showing non-archosaurian archosauromorphs (solid line with black squares) against pseudosuchians (dashed line with grey circles) and ornithodirans (dashed line with black circles). Significant changes between subsequent time bins are marked with an asterisk. Dotted lines mark missing time bins due to small sample sizes.

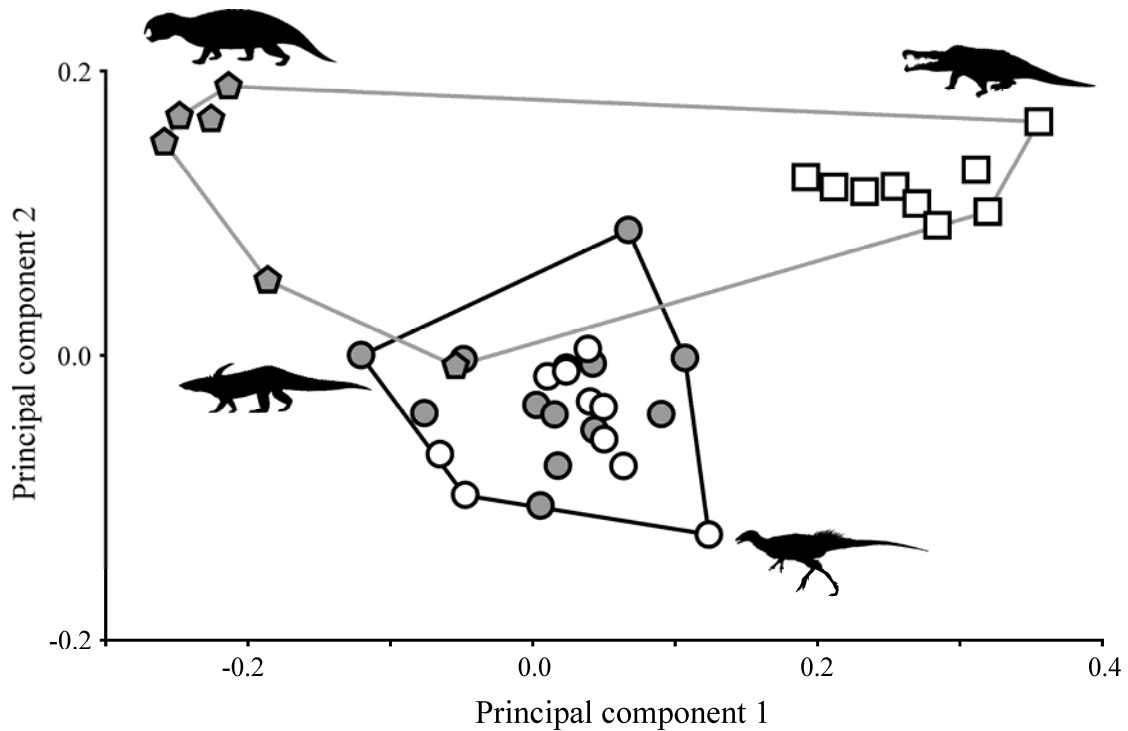

**Figure S4.** Two-dimensional morphospace of Late Triassic archosauromorphs showing the morphospace of non-archosaurian archosauromorphs (grey solid line with grey pentagons) including phytosaurs (white squares) and crown archosaurs (black solid line) with pseudosuchians (grey circles) and ornithodirans (white circles).

### 5.3. Cranial disparity trends within Ornithodira

Due to their poor record in earlier time bins, the oldest time interval for which we can estimate disparity for ornithodirans is the Carnian. From that interval, cranial disparity increases continuously until the Sinemurian, with both Ornithodira and Dinosauria showing significant shifts in morphospace from the Carnian to the early Norian (Fig. 4, S5). Disparity changes from the late Norian to Hettangian could not be estimated due to poor sampling in the later bin, but a significant increase is observed from the late Norian to the Sinemurian. In the Toarcian, cranial disparity decreases again (Table S15). When compared to each other, Pseudosuchia (including phytosaurs) and Ornithodira occupy significantly different areas in morphospace over the entire time

span (Table S16). When phytosaurs are excluded from crown-group archosaurs, however, the morphospace of pseudosuchians and ornithodirans overlaps in the early Norian (Table S17). The general differences in cranial morphospace over time between ornithodirans and pseudosuchians suggests that the two groups probably did not compete extensively with each other, e.g. for similar food resources. However, due to the poor fossil record of ornithodirans prior to the Late Triassic (Langer et al. 2013), nothing can be said about potential ecological overlap in previous time periods.

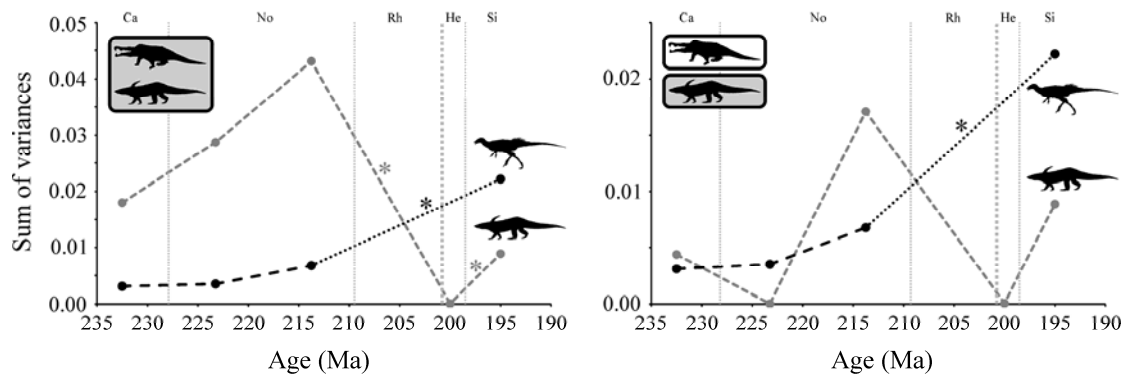

**Figure S5.** Temporal disparity of pseudosuchians (grey dashed line) and dinosaurs (black dashed line) from the Carnian to the end of the Early Jurassic. The left diagram shows the disparity trend when phytosaurs are members of the Pseudosuchia, while the right one shows the situation when phytosaurs are members of the stem-line.

#### 5.4. The impact of ancestral shapes for disparity analyses

To study disparity changes through time we included the shapes of hypothetical ancestors to increase temporal resolution. To estimate the impact of the ancestors, we calculated the temporal disparity curves for all groups (when phytosaurs are members of crown Archosauria) on the basis of terminal taxa only and compared them with the results presented in the main text (Table S18-S23). Using only terminal taxa results in



slightly higher disparity. However, as the magnitude of sum of variance, the disparity metric used in this study, depends on the sample size, the higher disparity values are a mathematical artefact as the sample size is reduced due to the exclusion of ancestral shapes. The shapes of the disparity curves through time are generally similar for both approaches (Fig. S6), so that we assume that the basic trends described in this study are still valid. The inclusion of ancestral shapes furthermore allowed us to estimate disparity for earlier time bins and for those with low sample sizes. This is especially true for the Early Jurassic, where the fossil record of pseudosuchians and ornithodirans is generally low, complicating the estimation of statistically meaningful disparity values (Fig. S6).

**Table S18.** Sum of variances of Archosauromorpha (just terminal taxa) through time when phytosaurs are members of the crown. NA = non-archosaurian.

|                                  | <b>all Archosauromorpha</b> | <b>Ornithodira</b> | <b>Dinosauria</b>   |
|----------------------------------|-----------------------------|--------------------|---------------------|
| <b>EARLY TRIASSIC (ET)</b>       | 0.0069                      | -                  | -                   |
| <b>ANISIAN (ANI)</b>             | 0.0246                      | -                  | -                   |
| <b>LADINIAN (LAD)</b>            | 0.0176                      | -                  | -                   |
| <b>CARNIAN (CAR)</b>             | 0.0527                      | 0.0090             | 0.0090              |
| <b>NORIAN1 (NOR1)</b>            | 0.0564                      | -                  | -                   |
| <b>NORIAN2 (NOR2)</b>            | 0.0369                      | 0.0094             | 0.0081              |
| <b>SINEMURIAN (SIN)</b>          | 0.0324                      | 0.0288             | 0.0288              |
| <b>TOARCIAN (TOA)</b>            | 0.0397                      | 0.0210             | -                   |
| <b>Phytosaurs as crown group</b> | <b>NA-Archosauromorpha</b>  | <b>Archosauria</b> | <b>Pseudosuchia</b> |
| <b>EARLY TRIASSIC (ET)</b>       | 0.0069                      | -                  | -                   |
| <b>ANISIAN (ANI)</b>             | 0.0215                      | -                  | -                   |
| <b>LADINIAN (LAD)</b>            | 0.0237                      | 0.0129             | 0.0129              |
| <b>CARNIAN (CAR)</b>             | 0.0150                      | 0.0240             | 0.0252              |
| <b>NORIAN1 (NOR1)</b>            | -                           | 0.0346             | 0.0319              |
| <b>NORIAN2 (NOR2)</b>            | -                           | 0.0351             | 0.0424              |
| <b>SINEMURIAN (SIN)</b>          | -                           | 0.0324             | -                   |
| <b>TOARCIAN (TOA)</b>            | -                           | 0.0397             | -                   |

**Table S19.** Statistical differences of sum of variances and morphospace position between subsequent time bins for all Archosauromorpha (just terminal taxa). Bold p-values represent significant results.

|                  | Sum of Variance |               | NPMANOVA |         |
|------------------|-----------------|---------------|----------|---------|
|                  | Difference      | p-value       | F        | p-value |
| <b>ET-ANI</b>    | 0.0177          | <b>0.0047</b> | 4.1770   | 0.5796  |
| <b>ANI-LAD</b>   | -0.0070         | 0.2463        | 1.5380   | 1.0000  |
| <b>LAD-CAR</b>   | 0.0352          | 0.2013        | 0.5349   | 1.0000  |
| <b>CAR-NOR1</b>  | 0.0036          | 0.8671        | 1.4830   | 1.0000  |
| <b>NOR1-NOR2</b> | -0.0194         | 0.2061        | 0.8348   | 1.0000  |
| <b>NOR2- SIN</b> | -0.0046         | 0.7739        | 3.1540   | 0.8148  |
| <b>SIN-TOA</b>   | 0.0074          | 0.7641        | 2.3690   | 1.0000  |

**Table S20.** Statistical differences of sum of variances and morphospace position between subsequent time bins for non-archosaurian Archosauromorpha (just terminal taxa) when phytosaurs are members of the crown. Bold p-values represent significant results.

| Phytosauria as crown | Sum of Variance |               | NPMANOVA |               |
|----------------------|-----------------|---------------|----------|---------------|
|                      | Difference      | p-value       | F        | p-value       |
| <b>ET-ANI</b>        | 0.0146          | <b>0.0098</b> | 5.8550   | <b>0.0468</b> |
| <b>ANI-LAD</b>       | 0.0021          | 0.8186        | 2.0420   | 0.7086        |
| <b>LAD-CAR</b>       | -0.0086         | 0.8475        | 9.0920   | 0.6312        |

**Table S21.** Statistical differences of sum of variances and morphospace position between subsequent time bins for Archosauria (just terminal taxa) when phytosaurs are members of the crown. Bold p-values represent significant results.

|                             | Sum of Variance |         | NPMANOVA |         |
|-----------------------------|-----------------|---------|----------|---------|
|                             | Difference      | p-value | F        | p-value |
| <b>Phytosauria as crown</b> |                 |         |          |         |
| <b>LAD-CAR</b>              | 0.0112          | 0.9163  | 1.1110   | 1.0000  |
| <b>CAR-NOR1</b>             | 0.0106          | 0.4394  | 2.1960   | 1.0000  |
| <b>NOR1-NOR2</b>            | 0.0005          | 0.9772  | 0.8255   | 1.0000  |
| <b>NOR2- SIN</b>            | -0.0028         | 0.8651  | 3.9240   | 0.2250  |
| <b>SIN-TOA</b>              | 0.0074          | 0.7826  | 2.3690   | 0.9720  |

**Table S22.** Statistical differences of sum of variances and morphospace position between subsequent time bins for Pseudosuchia (just terminal taxa) when phytosaurs are members of the crown. Bold p-values represent significant results.

|                             | Sum of Variance |         | NPMANOVA |         |
|-----------------------------|-----------------|---------|----------|---------|
|                             | Difference      | p-value | F        | p-value |
| <b>Phytosauria as crown</b> |                 |         |          |         |
| <b>LAD-CAR</b>              | 0.0123          | 0.9812  | 2.0760   | 0.5316  |
| <b>CAR-NOR1</b>             | 0.0067          | 0.5331  | 1.6940   | 1.0000  |
| <b>NOR1-NOR2</b>            | 0.0105          | 0.4711  | 0.9249   | 1.0000  |

**Table S23.** Statistical differences of sum of variances and morphospace position between subsequent time bins for Ornithodira/Dinosauria (just terminal taxa) when phytosaurs are members of the crown. Bold p-values represent significant results.

|                    | Sum of Variance |         | NPMANOVA |         |
|--------------------|-----------------|---------|----------|---------|
|                    | Difference      | p-value | F        | p-value |
| <b>Ornithodira</b> |                 |         |          |         |
| <b>CAR-NOR2</b>    | 0.0004          | 0.9543  | 2.1970   | 0.5634  |
| <b>NOR2-SIN</b>    | 0.0194          | 0.1162  | 2.0490   | 0.7866  |
| <b>SIN-TOA</b>     | -0.0079         | 0.5706  | 0.9408   | 1.0000  |
| <b>Dinosauria</b>  |                 |         |          |         |
| <b>CAR-NOR2</b>    | -0.0009         | 0.9643  | 2.5320   | 0.3273  |
| <b>NOR2-SIN</b>    | 0.0207          | 0.1229  | 2.0490   | 0.3585  |

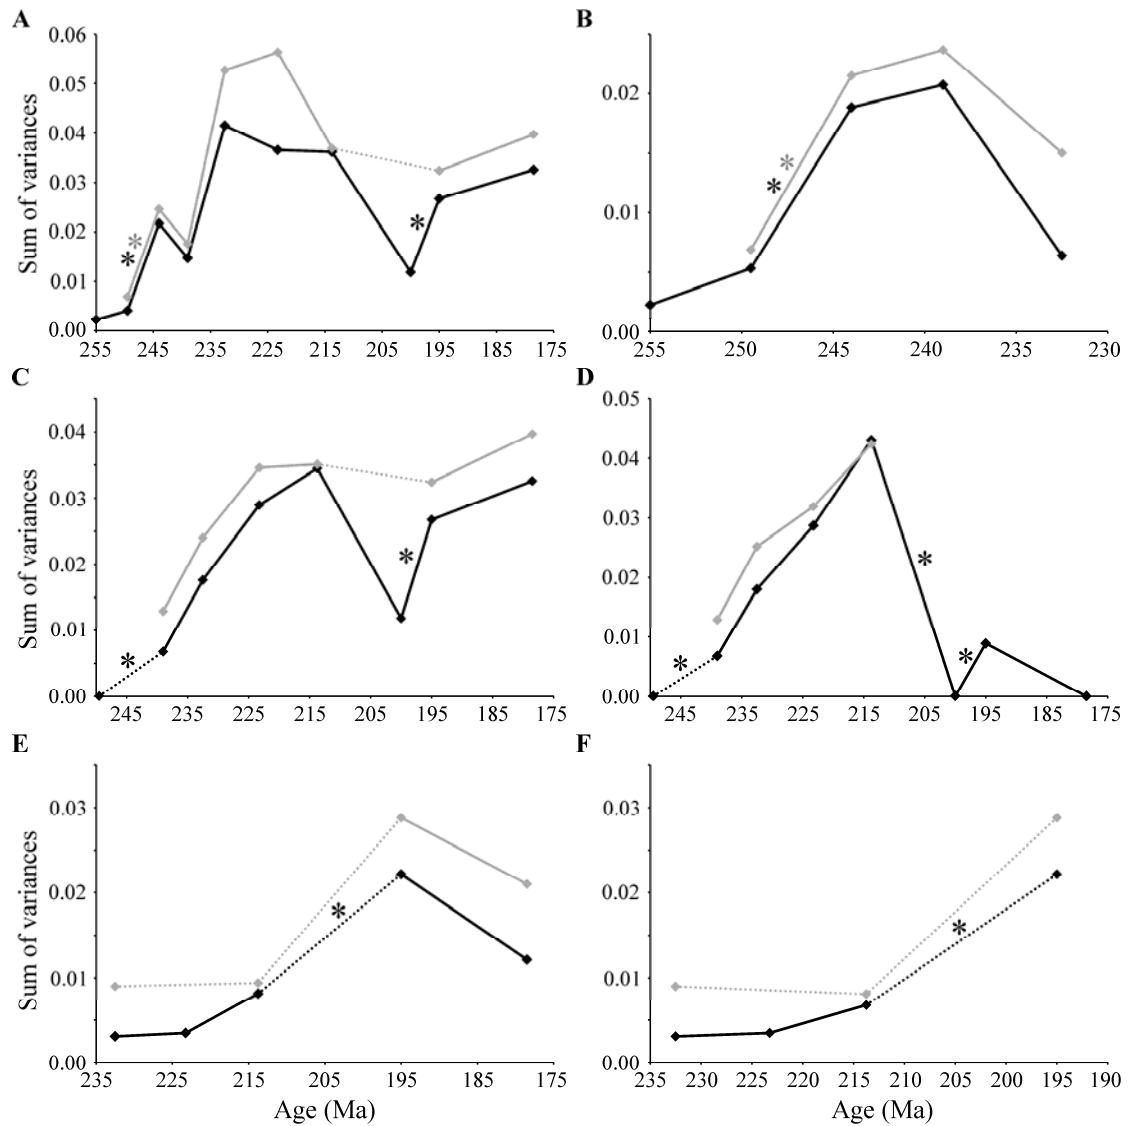

**Figure S6.** Comparison of disparity through time for various archosauromorph groups (when phytosaurs are crown archosaurs), if shapes of hypothetical ancestors were included (black line) or excluded (grey line). **(A)** Archosauromorpha. **(B)** Non-archosaurian Archosauromorpha. **(C)** Archosauria. **(D)** Pseudosuchia. **(E)** Ornithodira. **(F)** Dinosauria. Significant changes between subsequent time bins are marked with an asterisk. Dotted lines mark missing time bins due to small sample sizes.

### 5.5. The impact sample size for disparity analyses

To test the impact of sample size on the Sum of Variance disparity values recovered for each bin we performed Spearman's rank-order correlation tests and ordinary least squares (OLS) and generalized least squares (GLS) regression analyses with a first-order autoregressive model. Spearman's rank-order correlation test is a linear correlation test based on ranks, in which the  $r_s$  coefficient describes the strength of the correlation. This coefficient ranges from -1 to 1, in which  $r_s = 0$  indicates no correlation (Hammer & Harper 2006). This test was performed in PAST (Hammer et al. 2001). While OLS estimates the strength of serial correlation between two variables by minimizing the sum of squares from a 'random' error (Hammer & Harper 2006), GLS uses maximum likelihood to correct for non-independence between adjacent points (Hansen 2007). Strength of correlation is given in form of  $R^2$  for OLS and  $\phi$  (dispersion parameter) and a correlation parameter for GLS. P-values indicate how significantly different the estimate slopes are from zero. All regression analyses were performed in R (R Development Core Team 2011), in which GLS was performed using the *gls()* function of the package 'nlme' (Pinheiro et al. 2016).

The majority of disparity curves show a weak correlation with sample size in the GLS regressions, but these correlations are significant only for all Archosauromorpha and Pseudosuchia (when phytosaurs are member of the crown). The latter result is also supported as significant by OLS and Spearman's correlation tests, while all other comparisons were non-significant. The correlations found for Archosauromorpha and Pseudosuchia might indicate that changes in disparity could be partly driven by sample size, and thus representing an artefact of variation in fossil record sampling through time. On the other hand, it could alternatively indicate that for these groups cranial disparity and species diversity are linked with each other,

indicating weak constraints on cranial disparity (see Wesley-Hunt 2005). Further discussion of this point is provided in the main text.

**Table S24.** Results of ordinary least squares (OLS) and generalised least squares (GLS) regressions, and Spearman’s correlation of skull shape disparity and sample size per bin. Values in brackets show the p-value of the slope, in which bold values indicate a significant result.

|                                  | OLS                  |                | GLS                  |         |             | Spearman’s           |
|----------------------------------|----------------------|----------------|----------------------|---------|-------------|----------------------|
|                                  | Slope                | R <sup>2</sup> | Slope                | φ       | Correlation | r <sub>s</sub>       |
| <b>all Archosauromorpha</b>      | 324.0 (0.097)        | 0.3059         | <b>294.3 (0.010)</b> | -0.1579 | -0.8800     | 0.596 (0.069)        |
| <b>Ornithodira</b>               | 28.1 (0.885)         | 0.0082         | 30.9 (0.877)         | 0.0502  | -0.7960     | -0.026 (0.933)       |
| <b>Dinosauria</b>                | 56.2 (0.754)         | 0.0606         | 184.3 (0.068)        | -0.8980 | -0.8260     | 0.5 (0.667)          |
| <b>Phytosaurs as crown group</b> |                      |                |                      |         |             |                      |
| <b>NA-Archosauromorpha</b>       | -25.6 (0.922)        | 0.0037         | -27.3 (0.919)        | 0.4133  | -0.6150     | -0.500 (0.450)       |
| <b>Archosauria</b>               | 410.0 (0.119)        | 0.3555         | 410.7 (0.119)        | 0.0051  | -0.8720     | 0.664 (0.093)        |
| <b>Pseudosuchia</b>              | <b>292.2 (0.001)</b> | 0.8529         | <b>294.3 (0.000)</b> | -0.4280 | -0.7870     | <b>0.915 (0.004)</b> |
| <b>Phytosaurs as stem group</b>  |                      |                |                      |         |             |                      |
| <b>NA-Archosauromorpha</b>       | -16.8 (0.761)        | 0.0202         | -20.9 (0.702)        | -0.0383 | -0.7730     | 0.018 (0.987)        |
| <b>Archosauria</b>               | 80.2 (0.732)         | 0.0210         | 46.9 (0.783)         | -0.3834 | -0.8410     | 0.323 (0.433)        |
| <b>Pseudosuchia</b>              | 272.4 (0.088)        | 0.4089         | 261.5 (0.117)        | -0.1276 | -0.7060     | 0.639 (0.088)        |

## 5.6. The age of the Chañares Formation

During the writing of this manuscript, Marsicano et al. (2015) published the first radioisotopic dates for the Argentinean Chañares Formation (Ischigualasto-Villa Unión Basin). This unit was historically considered to be Ladinian (Rogers et al., 2001) or Ladinian–earliest Carnian in age (Desojo et al., 2011) based on biostratigraphical evidence and absolute dating of overlying formations. The dates published by Marsicano et al. (2015) are based on chemical abrasion thermal ionization mass spectrometry (CA-TIMS) of U–Pb zircons from two different stratigraphic layers that contain tuff in the lower member of the formation. These

dates ( $236.1 \pm 0.6$  Ma and  $233.7 \pm 0.4$  Ma, respectively) indicate that most of the formation is early Carnian and not Ladinian, but since the Ladinian-Carnian boundary occurs at ca. 237 Ma (Gradstein et al., 2012) the lowermost portion of the unit could still be uppermost Ladinian in age. This new date for the Chañares Formation has an impact on the binning of three taxa used in our study: *Gracilisuchus stipanicorum*, *Chanaresuchus bonapartei* and *Gualosuchus reigi*. These three species occur within the first 7–30 metres of the unit and thus are positioned very close to the Ladinian–Carnian boundary (MDE pers. obs.). As a result, the Ladinian–earliest Carnian age used here for these taxa is still valid.

## 6. References

- Adams, D. C. 2014. A generalized K statistic for estimating phylogenetic signal from shape and other high-dimensional multivariate data. *Syst. Biol.* 63:685–697.
- Adams, D. C., and E. Otárola-Castillo. 2013. geomorph: an R package for the collection and analysis of geometric morphometric shape data. *Methods Ecol. Evol.* 4:393–399.
- Andres, B., and T. S. Myers. 2013. Lone star pterosaurs. *Earth Environ. Sci. Trans. R. Soc. Edinburgh* 103:383–398.
- Barrett, P. M., R. J. Butler, and F. Knoll. 2005. Small-bodied ornithischian dinosaurs from the Middle Jurassic of Sichuan, China. *J. Vertebr. Paleontol.* 25:823–834.
- Bennett, S. C. 2014. A new specimen of the pterosaur *Scaphognathus crassirostris*, with comments on constraint of cervical vertebrae number in pterosaurs. *Neues Jahrb. für Geol. und Paläontologie, Abhandlungen* 271:327–348.

- Benton, M. J. 1990. The species of *Rhynchosaurus*, a rhynchosaur (Reptilia, Diapsida) from the Middle Triassic of England. *Philos. Trans. R. Soc. London, Ser. B* 328:213–306.
- Benton, M. J. 1983. The Triassic *Hyperodapedon* from Elgin: functional morphology and relationships. *Philos. Trans. R. Soc. London, Ser. B* 302:605–718.
- Blomberg, S. P., T. J. Garland, and A. R. Ives. 2003. Testing for phylogenetic signal in comparative data: behavioral traits are more labile. *Evolution (N. Y.)* 57:717–745.
- Brill, K., and K. Carpenter. 2006. A description of a new ornithopod from the Lytle Member of the Purgatoire Formation (Lower Cretaceous) and a reassessment of the skull of *Camptosaurus*. Pp. 49–67 in K. Carpenter, ed. *Horns and beaks: ceratopsian and ornithopod dinosaurs*. Indiana University Press, Bloomington.
- Bronzati, M., F. C. Montefeltro, and M. C. Langer. 2012. A species-level supertree of Crocodyliformes. *Hist. Biol.* 24:598–606.
- Brusatte, S. L., M. J. Benton, J. B. Desojo, and M. C. Langer. 2010. The higher-level phylogeny of Archosauria (Tetrapoda: Diapsida). *J. Syst. Palaeontol.* 8:3–47.
- Brusatte, S. L., M. J. Benton, M. Ruta, and G. T. Lloyd. 2008. Superiority, competition, and opportunism in the evolutionary radiation of dinosaurs. *Science* 321:1485–1488.
- Butler, R. J., P. M. Galton, L. B. Porro, L. M. Chiappe, M. D. Henderson, and G. M. Erickson. 2010. Lower limits of ornithischian dinosaur body size inferred from a new Upper Jurassic heterodontosaurid from North America. *Proc. R. Soc. B* 277:375–381.
- Butler, R. J., R. B. Irmis, and M. C. Langer. 2011. Late Triassic terrestrial biotas and the rise of dinosaurs. *Earth Environ. Sci. Trans. R. Soc. Edinburgh* 101:1–426.



- Butler, R. J., C. Sullivan, M. D. Ezcurra, J. Liu, A. Lecuona, and R. B. Sookias. 2014. New clade of enigmatic early archosaurs yields insights into early pseudosuchian phylogeny and the biogeography of the archosaur radiation. *BMC Evol. Biol.* 14:128.
- Cabreira, S. F., C. L. Schultz, J. S. Bittencourt, M. B. Soares, D. C. Fortier, L. R. Silva, and M. C. Langer. 2011. New stem-sauropodomorph (Dinosauria, Saurischia) from the Triassic of Brazil. *Naturwissenschaften* 98:1035–1040.
- Camp, C. L. 1930. A study of the phytosaurs with description of new material from western North America. *Mem. Univ. Calif.* 10:1–161.
- Carrano, M. T., R. B. J. Benson, and S. D. Sampson. 2012. The phylogeny of Tetanurae (Dinosauria: Theropoda). *J. Syst. Palaeontol.* 10:211–300.
- Carvalho, I. S., V. P. A. Teixeira, M. L. F. Ferraz, L. C. B. Ribeiro, A. G. Martinelli, F. M. Neto, J. J. W. Sertich, G. C. Cunha, I. C. Cunha, and P. F. Farraz. 2011. *Campinasuchus dinizi* gen. et sp. nov., a new Late Cretaceous baurusuchid (Crocodyliformes) from the Bauru Basin, Brazil. *Zootaxa* 2871:19–42.
- Carvalho, I. S., F. M. Vasconcellos, and S. A. S. Tavares. 2007. *Montealtosuchus arrudacamposi*, a new peirosaurid crocodile (Mesoeucrocodylia) from the Late Cretaceous Adamantina Formation of Brazil. *Zootaxa* 1607:35–46.
- Case, E. C. 1929. Description of the skull of a new form of phytosaur with notes on the characters of described North American phytosaurs. *Mem. Univ. Michigan Museums* 2:1–56.
- Case, E. C., and T. E. White. 1934. Two new specimens of phytosaurs from the Upper Triassic of western Texas. *Contrib. from Museum Paleontol.* 4:133–142.
- Chatterjee, S. 1974. A Rhynchosaur from the upper Triassic Maleri Formation of india. *Philos. Trans. R. Soc. London, Ser. B* 267:209–261.

- Cubo, J., N. Le Roy, C. Martinez-Maza, and L. Montes. 2012. Paleohistological estimation of bone growth rate in extinct archosaurs. *Paleobiology* 38:335–349.
- Currie, P. J., and X. Zhao. 1993. A new carnosaur (Dinosauria, Theropoda) from the Jurassic of Xinjiang, People's Republic of China. *Can. J. Earth Sci.* 30:2037–2081.
- Desojo, J. B., and A. M. Báez. 2007. Cranial morphology of the Late Triassic South American archosaur *Neoaetosauroides engaeus*: evidence for aetosaurian diversity. *Palaeontology* 50:267–276.
- Desojo, J. B., M. D. Ezcurra, and E. E. Kischlat. 2012. A new aetosaur genus (Archosauria: Pseudosuchia) from the early Late Triassic of southern Brazil. *Zootaxa* 3166:1–33.
- Desojo, J. B., M. D. Ezcurra, and C. L. Schultz. 2011. An unusual new archosauriform from the Middle-Late Triassic of southern Brazil and the monophyly of Doswelliidae. *Zool. J. Linn. Soc.* 161:839–871.
- Dilkes, D. 1998. The Early Triassic rhynchosaur *Mesosuchus browni* and the interrelationships of basal archosauromorph reptiles. *Philos. Trans. R. Soc. London, Ser. B* 353:501–541.
- Dilkes, D., and A. B. Arcucci. 2012. *Proterochampsia barrionuevoi* (Archosauriformes: Proterochampsia) from the Late Triassic (Carnian) of Argentina and a phylogenetic analysis of Proterochampsia. *Palaeontology* 55:853–885.
- Ezcurra, M. D. 2007. The cranial anatomy of the coelophysoid theropod *Zupaysaurus rougieri* from the Upper Triassic of Argentina. *Hist. Biol.* 19:185–202.
- Ezcurra, M. D. 2016. The phylogenetic relationships of basal archosauromorphs, with an emphasis on the systematics of proterosuchian archosauriforms. *PeerJ*.

- Ezcurra, M. D., and R. J. Butler. 2015a. Post-hatchling cranial ontogeny in the Early Triassic diapsid reptile *Proterosuchus fergusi*. *J. Anat.* 226:387–402.
- Ezcurra, M. D., and R. J. Butler. 2015b. Taxonomy of the proterosuchid archosauriforms (Diapsida: Archosauromorpha) from the earliest Triassic of South Africa, and implications for the early archosauriform radiation. *Palaeontology* 58:141–170.
- Ezcurra, M. D., T. M. Scheyer, and R. J. Butler. 2014. The origin and early evolution of Sauria: reassessing the Permian saurian fossil record and the timing of the crocodile-lizard divergence. *PLoS One* 9:e89165.
- Fiorelli, L., and J. O. Calvo. 2008. New remains of *Notosuchus terrestris* Woodward, 1896 (Crocodyliformes: Mesoeucrocodylia) from Late Cretaceous of Neuquén, Patagonia, Argentina. *Arq. do Mus. Nac. Rio Janeiro* 66:83–124.
- Flynn, J., S. J. Nesbitt, J. M. Parrish, L. Ranivoharimanana, and A. R. Wyss. 2010. A new species of *Azendohsaurus* (Diapsida: Archosauromorpha) from the Triassic Isalo Group of southwestern Madagascar: cranium and mandible. *Palaeontology* 53:669–688.
- Foth, C., H. Tischlinger, and O. W. M. Rauhut. 2014. New specimen of *Archaeopteryx* provides insights into the evolution of pennaceous feathers. *Nature* 511:79–82.
- Gomani, E. M. 1997. A crocodyliform from the Early Cretaceous dinosaur beds, Northern Malawi. *J. Vertebr. Paleontol.* 17:280–294.
- Gottmann-Quesada, A., and P. M. Sander. 2009. A redescription of the early archosauromorph *Protorosaurus speneri* Meyer, 1832 and its phylogenetic relationships. *Palaeontogr. Abt. A* 287:123–220.

- Gow, C. E., J. W. Kitching, and M. A. Raath. 1990. Skulls of the prosauropod dinosaur *Massospondylus carinatus* Owen in the collections of the Bernard Price Institute for Palaeontological Research. *Palaeontol. Africana* 27:45–58.
- Gower, D. J., and A. G. Sennikov. 1996. Morphology and phylogenetic informativeness of early archosaur braincases. *Palaeontology* 39:883–906.
- Gradstein, F. M., J. G. Ogg, M. D. Schmitz, and G. M. Ogg. 2012. *The Geologic Time Scale 2012*. Elsevier Academic Press, Amsterdam.
- Hammer, O. and Harper, D. A. T. 2006. *Paleontological data analysis*. Blackwell Publishing, Malden.
- Hammer O, Harper DAT, Ryan PD. 2001. PAST: paleontological statistics software package for education and data analysis. *Palaeontol. Electron.* 4:1–9.
- Hansen, C. B. 2007. Generalized least squares inference in panel and multilevel models with serial correlation and fixed effects. *J. Econometrics* 140:670–694.
- Haubold, H. 1990. Ein neuer Dinosaurier (Ornithischia, Thyreophora) aus dem Unteren Jura des nördlichen Mitteleuropa. *Rev. Paléobiologie* 9:149–177.
- Hone, D. W. E., and M. J. Benton. 2008. A new genus of rhynchosaur from the Middle Triassic of south-west England. *Palaeontology* 51:95–115.
- Hübner, T. R., and O. W. M. Rauhut. 2010. A juvenile skull of *Dysalotosaurus lettowvorbecki* (Ornithischia: Iguanodontia), and implications for cranial ontogeny, phylogeny, and taxonomy in ornithopod dinosaurs. *Zool. J. Linn. Soc.* 160:366–396.
- Hungerbühler, A. 2002. The Late Triassic phytosaur *Mystriosuchus westphali*, with a revision of the genus. *Palaeontology* 45:377–418.

- Irmis, R. B., and J. H. Whiteside. 2012. Delayed recovery of non-marine tetrapods after the end-Permian mass extinction tracks global carbon cycle. *Proc. R. Soc. B* 279:1310–1318.
- Kley, N. J., J. J. W. Sertich, A. H. Turner, D. W. Krause, P. M. O'Connor, and J. A. Georgi. 2010. Craniofacial morphology of *Simosuchus clarki* (Crocodyliformes: Notosuchia) from the Late Cretaceous of Madagascar. *J. Vertebr. Paleontol.* 30:13–98.
- Klingenberg, C. P. 2011. MorphoJ: an integrated software package for geometric morphometrics. *Mol. Ecol. Resour.* 11:353–357.
- Klingenberg, C. P., and N. A. Gidaszewski. 2010. Testing and quantifying phylogenetic signals and homoplasy in morphometric data. *Syst. Biol.* 59:245–261.
- Langer, M. C., F. C. Montefeltro, D. W. E. Hone, R. Whatley, and C. L. Schultz. 2010. On *Fodonyx spenceri* and a new rhynchosaur from the Middle Triassic of Devon. *J. Vertebr. Paleontol.* 30:1884–1888.
- Langer, M. C., S. J. Nesbitt, J. S. Bittencourt, and R. B. Irmis. 2013. Non-dinosaurian Dinosauromorpha. *Geol. Soc. London, Spec. Publ.* 379:157–186.
- Langer, M. C., and C. L. Schultz. 2000. A new species of the Late Triassic rhynchosaur *Hyperodapedon* from the Santa Maria Formation of south Brazil. *Palaeontology* 43:633–652.
- Larsson, H. C. E., and H.-D. Sues. 2007. Cranial osteology and phylogenetic relationships of *Hamadasuchus rebouli* (Crocodyliformes: Mesoeucrocodylia) from the Cretaceous of Morocco. *Zool. J. Linn. Soc.* 149:533–567.
- Lau, K. V., K. Maher, D. Altiner, B. M. Kelley, L. R. Kump, D. J. Lehrmann, J. C. Silva-Tamayo, K. L. Weaver, M. Yu, and J. L. Payne. 2016. Marine anoxia and

- delayed Earth system recovery after the end-Permian extinction. *Proc. Natl. Acad. Sci.* 113:2360 – 2365.
- Laurin, M. 2004. The evolution of body size, Cope's rule and the origin of amniotes. *Syst. Biol.* 53:594–622.
- Leal, L. A., S. A. K. Azevedo, A. W. A. Kellner, and A. A. S. Da Rosa. 2004. A new early dinosaur (Sauropodomorpha) from the Caturrita Formation (Late Triassic), Paraná Basin, Brazil. *Zootaxa* 690:1–24.
- Li, C., X. Wu, Y. Cheng, T. Sato, and L. Wang. 2006. An unusual archosaurian from the marine Triassic of China. *Naturwissenschaften* 93:200–206.
- Loewen, M. A. 2009. Variation in the Late Jurassic theropod dinosaur *Allosaurus*: ontogenetic, functional, and taxonomic implications. University of Utah, Salt Lake City.
- Maidment, S. C. R., D. B. Norman, P. M. Barrett, and P. Upchurch. 2008. Systematics and phylogeny of Stegosauria (Dinosauria: Ornithischia). *J. Syst. Palaeontol.* 6:1815–1821.
- Mannion, P. D., R. B. J. Benson, M. T. Carrano, J. P. Tennant, J. Judd, and R. J. Butler. 2015. Climate constrains the evolutionary history and biodiversity of crocodylians. *Nat. Commun.* 6:8438.
- Marsicano, C. A., R. B. Irmis, A. C. Mancuso, R. Mundil, and F. Chiarenza. 2015. The precise temporal calibration of dinosaur origins. *Proc. Natl. Acad. Sci.* 113:509–513.
- Martínez, R. N. 2009. *Adeopapposaurus mognai*, gen. et sp. nov. (Dinosauria: Sauropodomorpha), with comments on adaptations of basal Sauropodomorpha. *J. Vertebr. Paleontol.* 29:142–164.

- Martínez, R. N., C. Apaldetti, and D. Abelin. 2013. Basal sauropodomorphs from the Ischigualasto Formation. *Soc. Vertebr. Paleontol. Mem.* 12:51–69.
- McDonald, A. T., J. I. Kirkland, D. D. DeBlieux, S. K. Madsen, J. Cavin, A. R. Milner, and L. Panzarin. 2010. New basal iguanodonts from the Cedar Mountain Formation of Utah and the evolution of thumb-spiked dinosaurs. *PLoS One* 5:e14075.
- Montefeltro, F. C., M. C. Langer, and C. L. Schultz. 2010. Cranial anatomy of a new genus of hyperodapedontine rhynchosaur (Diapsida, Archosauromorpha) from the Upper Triassic of southern Brazil. *Earth Environ. Sci. Trans. R. Soc. Edinburgh* 101:27–52.
- Nesbitt, S. J. 2011. The early evolution of archosaurs: relationships and the origin of major clades. *Bull. Am. Museum Nat. Hist.* 352:1–292.
- Nesbitt, S. J., J. B. Desojo, and R. B. Irmis. 2013. Anatomy, phylogeny and palaeobiology of early archosaurs and their kin. *Geol. Soc. London, Spec. Publ.* 379:1–608. London.
- Norman, D. B., A. W. Crompton, R. J. Butler, L. B. Porro, and A. J. Charig. 2011. The Lower Jurassic ornithischian dinosaur *Heterodontosaurus tucki* Crompton & Charig, 1962: cranial anatomy, functional morphology, taxonomy, and relationships. *Zool. J. Linn. Soc.* 163:182–276.
- Nosotti, S. 2007. *Tanystropheus longobardicus* (Reptilia, Protorosauria) : re-interpretations of the anatomy based on new specimens from the Middle Triassic of Besano (Lombardy, Northern Italy). *Mem. della Soc. Ital. di Sci. Nat. e del Mus. Civ. di Stor. Nat. di Milano* 35:1–88.

- Osmólska, H., S. Hua, and E. Buffetaut. 1997. *Gobiosuchus kielanae* (Protosuchia) from the Late Cretaceous of Mongolia: anatomy and relationships. *Acta Palaeontol. Pol.* 42:257–289.
- Ouyang, H., and Y. Ye. 2002. The first mamenchisaurian skeleton with complete skull, *Mamenchisaurus youngi*. Sichuan Science and Technology Press, Chengdu.
- Paradis, E. 2012. Analysis of phylogenetics and evolution with R. Springer, New York.
- Parker, W. G., and R. B. Irmis. 2006. A new species of the Late Triassic phytosaur *Pseudopalatus* (Archosauria: Pseudosuchia) from Petrified Forest National Park, Arizona. *Museum North. Arizona Bull.* 62:126–143.
- Peyer, K. 2006. A reconsideration of *Compsognathus* from the Upper Tithonian of Canjuers, southeastern France. *J. Vertebr. Paleontol.* 26:879–896.
- Pierce, S. E., K. D. Angielczyk, and E. J. Rayfield. 2009. Shape and mechanics in thalattosuchian (Crocodylomorpha) skulls: implications for feeding behaviour and niche partitioning. *J. Anat.* 215:555–576.
- Pierce, S. E., and M. J. Benton. 2006. *Pelagosaurus typus* Bronn, 1841 (Mesoeucrocodylia: Thalattosuchia) from the Upper Lias (Toarcian, Lower Jurassic) of Somerset, England. *J. Vertebr. Paleontol.* 26:621–635.
- Pinheiro, J., Bates, D., DebRoy, S., Sarkar, D., EISPACk, Heisterkamp, S., Van Willigen, B. and R Development Core Team. 2016. nlme: linear and nonlinear mixed effects models. R package version 3.1-126: 1–336.
- Pol, D., and Z. Gasparini. 2009. Skull anatomy of *Dakosaurus andiniensis* (Thalattosuchia: Crocodylomorpha) and the phylogenetic position of Thalattosuchia. *J. Syst. Palaeontol.* 7:163–197.



- Pol, D., P. M. Nascimento, A. B. Carvalho, C. Riccomini, R. A. Pires-Domingues, and H. Zaher. 2014. A new notosuchian from the Late Cretaceous of Brazil and the phylogeny of advanced notosuchians. *PLoS One* 9:e93105.
- Pol, D., and O. W. M. Rauhut. 2012. A Middle Jurassic abelisaurid from Patagonia and the early diversification of theropod dinosaurs. *Proc. R. Soc. B* 279:3170–3175.
- Pritchard, A. C., A. H. Turner, S. J. Nesbitt, R. B. Irmis, and N. D. Smith. 2015. Late Triassic tanystropheids (Reptilia, Archosauromorpha) from northern New Mexico (Petrified Forest Member, Chinle Formation) and the biogeography, functional morphology, and evolution of Tanystropeidae. *J. Vertebr. Paleontol.* 35:e911186.
- Rauhut, O. W. M. 2014. New observations on the skull of *Archaeopteryx*. *Paläontologische Zeitschrift* 88:211–221.
- Rauhut, O. W. M. 2003. The interrelationships and evolution of basal theropod dinosaurs. *Spec. Pap. Palaeontol.* 69:1–213.
- Rauhut, O. W. M., R. Fechner, K. Remes, and K. Reis. 2011. How to get big in the Mesozoic: the evolution of the sauropodomorph body plan. Pp. 119–149 in N. Klein, K. Remes, C. T. Gee, and P. M. Sander, eds. *Biology of the sauropod dinosaurs: understanding the life of giants*. Indiana University Press, Bloomington.
- R Development Core Team. 2011. R: a language and environment for statistical computing. <http://www.r-project.org>. R Foundation for Statistical Computing, Vienna.
- Rogers, R. R., A. B. Arcucci, F. Abdala, P. C. Sereno, C. A. Forster, and C. May. 2001. Paleoenvironment and taphonomy of the Chañares Formation tetrapod assemblage (Middle Triassic), northwestern Argentina: spectacular preservation in volcanogenic concretions. *Palaios* 16:461–481.

- Romer, A. S. 1971. The Chanares (Argentina) Triassic reptile fauna. XI. Two new long-snouted thecodonts, *Chanaresuchus* and *Gualosuchus*. *Breviora* 379:1–22.
- Salisbury, S. W., R. E. Molnar, E. Frey, and P. M. A. Willis. 2006. The origin of modern crocodyliforms: new evidence from the Cretaceous of Australia. *Proc. R. Soc. B* 273:2439–2448.
- Saller, F., S. Renesto, and F. M. Dalla Vecchia. 2013. First record of *Langobardisaurus* (Diapsida, Protorosauria) from the Norian (Late Triassic) of Austria, and a revision of the genus. *Neues Jahrb. für Geol. und Paläontologie, Abhandlungen* 268:83–95.
- Sampson, S. D., and L. M. Witmer. 2007. Craniofacial anatomy of *Majungasaurus crenatissimus* (Theropoda: Abelisauridae) from the Late Cretaceous of Madagascar. *Soc. Vertebr. Paleontol. Mem.* 8:32–102.
- Schoch, R. R. 2007. Osteology of the small archosaur *Aetosaurus* from the Upper Triassic of Germany. *Neues Jahrb. für Geol. und Paläontologie, Abhandlungen* 246:1–35.
- Sereno, P. C. 1991. Basal archosaurs: phylogenetic relationships and functional implications. *Soc. Vertebr. Paleontol. Mem.* 2:1–53.
- Sereno, P. C., S. Chao, Z. Cheng, and C. Rao. 1988. *Psittacosaurus meileyingensis* (Ornithischia: Ceratopsia), a new psittacosaur from the Lower Cretaceous of northeastern China. *J. Vertebr. Paleontol.* 8:366–377.
- Sereno, P. C., and Z. Dong. 1992. The skull of the basal stegosaur *Huayangosaurus taibaii* and a cladistic diagnosis of Stegosauria. *J. Vertebr. Paleontol.* 12:318–343.
- Sereno, P. C., and H. C. E. Larsson. 2009. Cretaceous crocodyliforms from the Sahara. *Zookeys* 28:1–143.

- Sereno, P. C., H. C. E. Larsson, C. A. Sidor, and B. Gado. 2001. The giant crocodyliform *Sarcosuchus* from the Cretaceous of Africa. *Science* 294:1516–1519.
- Sereno, P. C., R. N. Martínez, and O. A. Alcober. 2013. Osteology of *Eoraptor lunensis* (Dinosauria, Sauropodomorpha). *Soc. Vertebr. Paleontol. Mem.* 12:83–179.
- Sertich, J. J. W., and P. M. O’Connor. 2014. A new crocodyliform from the middle Cretaceous Galula Formation, southwestern Tanzania. *J. Vertebr. Paleontol.* 34:576–596.
- Sidor, C. A., D. A. Vilhena, K. D. Angielczyk, A. K. Huttenlocker, S. J. Nesbitt, B. R. Peacock, J. S. Steyer, R. M. H. Smith, and L. A. Tsuji. 2013. Provincialization of terrestrial faunas following the end-Permian mass extinction. *Proc. Natl. Acad. Sci.* 110:8129–8133.
- Small, B. J. 2002. Cranial anatomy of *Desmotosuchus haplocerus* (Reptilia: Archosauria: Stagonolepididae). *Zool. J. Linn. Soc.* 136:97–111.
- Small, B. J., and J. W. Martz. 2013. A new aetosaur from the Upper Triassic Chinle Formation of the Eagle Basin, Colorado, USA. *Geol. Soc. London, Spec. Publ.* 379:393–412.
- Sookias, R. B., R. B. J. Benson, and R. J. Butler. 2012a. Biology, not environment, drives major patterns in maximum tetrapod body size through time. *Biol. Lett.* 8:674–677.
- Sookias, R. B., R. J. Butler, and R. B. J. Benson. 2012b. Rise of dinosaurs reveals major body-size transitions are driven by passive processes of trait evolution. *Proc. R. Soc. B* 279:2180–2187.

- Stocker, M. R. 2010. A new taxon of phytosaur (Archosauria: Pseudosuchia) from the Late Triassic (Norian) Sonsela Member (Chinle Formation) in Arizona, and a critical reevaluation of *Leptosuchus* Case, 1922. *Palaeontology* 53:997–1022.
- Sues, H.-D., and N. C. Fraser. 2010. *Triassic life on land*. Columbia University Press, New York.
- Sues, H.-D., S. J. Nesbitt, D. S. Berman, and A. C. Henrici. 2011. A late-surviving basal theropod dinosaur from the latest Triassic of North America. *Proc. R. Soc. B* 278:3459–3464.
- Sulej, T. 2010. The skull of an early Late Triassic aetosaur and the evolution of the stagonolepidid archosaurian reptiles. *Zool. J. Linn. Soc.* 158:860–881.
- Toljagic, O., and R. J. Butler. 2013. Triassic/Jurassic mass extinction as trigger for the Mesozoic radiation of crocodylomorphs. *Biol. Lett.* 9:20130095.
- Turner, A. H., and G. A. Buckley. 2008. *Mahajangasuchus insignis* (Crocodyliformes: Mesoeucrocodylia) cranial anatomy and new data on the origin of the eusuchian-style palate. *J. Vertebr. Paleontol.* 28:382–408.
- Tykoski, R. S. 2005. *Anatomy, ontogeny, and phylogeny of coelophysoid theropods*. The University of Texas, Austin.
- Wang, R., S. Xu, X. Wu, C. Li, and S. Wang. 2013. A new specimen of *Shanisuchus shanisuchus* Young, 1964 (Diapsida: Archosauriformes) from the Triassic of Shanxi, China. *Acta Geol. Sin.* 87:1185–1197.
- Weinbaum, J. C. 2011. The skull of *Postosuchus kirkpatricki* (Archosauria: Paracrocodyliformes) from the Upper Triassic of the United States. *PaleoBios* 30:18–44.
- Wellnhofer, P. 1975. Die Rhamphorhynchoidea (Pterosauria) der Oberjura-Plattenkalke Süddeutschlands. *Palaeontogr. Abt. A* 148:1–185.

- Wellnhofer, P. 1978. Pterosauria. Gustav Fischer Verlag, Stuttgart, New York.
- Wesley-Hunt GD. 2005. The morphological diversification of carnivores in North America. *Paleobiology* 31:35–55.
- Westphal, F. 1976. Phytosauria. Pp. 99–120 in O. Kuhn, ed. *Handbuch der Paläoherpetologie*. Gustav Fischer Verlag, Stuttgart.
- Wilson, J. A. 2002. Sauropod dinosaur phylogeny: critique and cladistic analysis. *Zool. J. Linn. Soc.* 136:217–276.
- Wilson, J. A., and P. C. Sereno. 1998. Early evolution and higher-level phylogeny of sauropod dinosaurs. *Soc. Vertebr. Paleontol. Mem.* 5:1–68.
- Wu, X., and S. Chatterjee. 1993. *Dibothrosuchus elaphros*, a crocodylomorph from the Lower Jurassic of China and the phylogeny of the Sphenosuchina. *J. Vertebr. Paleontol.* 13:58–89.
- Wu, X., A. P. Russell, and D. B. Brinkman. 2001. A review of *Leidyosuchus canadensis* Lambe, 1907 (Archosauria: Crocodylia) and an assessment of cranial variation based upon new material. *Can. J. Earth Sci.* 38:1665–1687.
- Xu, L., J. M. Clark, J. Mo, J. N. Choiniere, C. A. Forster, G. M. Erickson, D. W. E. Hone, C. Sullivan, D. A. Eberth, S. J. Nesbitt, Q. Zhao, R. Hernandez, C. Jia, F. Han, and Y. Guo. 2009. A Jurassic ceratosaur from China helps clarify avian digital homologies. *Nature* 459:940–944.
- Xu, X., J. M. Clark, C. A. Forster, M. A. Norell, G. M. Erickson, D. A. Eberth, C. Jia, and Q. Zhao. 2006a. A basal tyrannosauroid dinosaur from the Late Jurassic of China. *Nature* 439:715–718.
- Xu, X., C. A. Forster, J. M. Clark, and J. Mo. 2006b. A basal ceratopsian with transitional features from the Late Jurassic of northwestern China. *Proc. R. Soc. B* 273:2135–2140.

- Yates, A. M. 2012. Basal Sauropodomorpha: the “prosauropods.” Pp. 425–444 in M. K. Brett-Surman, T. R. J. Holtz, and J. O. Farlow, eds. *The complete dinosaur*. Indiana University Press, Bloomington.
- Yates, A. M. 2007. The first complete skull of the Triassic dinosaur *Melanorosaurus* Haughton (Sauropodomorpha: Anchisauria). *Spec. Pap. Palaeontol.* 77:9–55.
- Yates, A. M. 2003. The species taxonomy of the sauropodomorph dinosaurs from the Löwenstein Formation (Norian, Late Triassic) of Germany. *Palaeontology* 46:317–337.
- Young, M. T., S. L. Brusatte, M. Ruta, and M. B. Andrade. 2010. The evolution of Metriorhynchoidea (Mesoeucrocodylia, Thalattosuchia): an integrated approach using geometric morphometrics, analysis of disparity, and biomechanics. *Zool. J. Linn. Soc.* 158:801–859.
- Zaher, H., D. Pol, A. B. Carvalho, C. Riccomini, D. Campos, and W. Nava. 2006. Redescription of the cranial morphology of *Mariliasuchus amarali*, and its phylogenetic affinities (Crocodyliformes, Notosuchia). *Am. Museum Novit.* 3512:1–40.
